# 1 Genetic and phylogenetic analysis of dissimilatory iodate-reducing bacteria identifies 2 potential niches across the world's oceans

3  
4 Victor Reyes-Umana<sup>1</sup>, Zachary Henning<sup>1</sup>, Kristina Lee<sup>1</sup>, Tyler P. Barnum<sup>1</sup>, John D. Coates<sup>1</sup>

5 <sup>1</sup>Department of Plant and Microbial Biology, University of California, Berkeley, CA 94720, USA  
6

## 7 Abstract

8 Iodine is oxidized and reduced as part of a biogeochemical cycle that is especially pronounced in  
9 the oceans, where the element naturally concentrates. The use of oxidized iodine in the form of  
10 iodate (IO<sub>3</sub><sup>-</sup>) as an electron acceptor by microorganisms is poorly understood. Here, we outline  
11 genetic, physiological, and ecological models for dissimilatory IO<sub>3</sub><sup>-</sup> reduction to iodide (I<sup>-</sup>) by a  
12 novel estuarine bacterium, *Denitromonas iodocrescerans* strain IR-12, *sp. nov.* Our results show  
13 that dissimilatory iodate reduction (DIR) by strain IR-12 is molybdenum-dependent and requires  
14 an IO<sub>3</sub><sup>-</sup> reductase (*idrA*) and likely other genes in a mobile cluster with a conserved association  
15 across known and predicted DIR microorganisms (DIRM). Based on genetic and physiological  
16 data, IO<sub>3</sub><sup>-</sup> is likely reduced to hypiodous acid (HIO), which rapidly disproportionates into IO<sub>3</sub><sup>-</sup>  
17 and iodide (I<sup>-</sup>), in a respiratory pathway that provides an energy yield equivalent to that of nitrate  
18 or perchlorate respiration. Consistent with the ecological niche expected of such a metabolism,  
19 *idrA* is enriched in the metagenome sequence databases of marine sites with a specific  
20 biogeochemical signature and diminished oxygen. Taken together, these data suggest that DIRM  
21 help explain the disequilibrium of the IO<sub>3</sub><sup>-</sup>:I<sup>-</sup> concentration ratio above oxygen minimum zones  
22 and support a widespread iodine redox cycle mediated by microbiology.

23

## 24 Introduction

25 Iodine (as <sup>127</sup>I) is the heaviest stable element of biological importance and an essential component  
26 of the human diet due to its role in thyroxine biosynthesis in vertebrates<sup>1-3</sup>. Iodine is enriched in  
27 marine environments where it exists in several oxidation states, reaching concentrations of up to  
28 450 nM<sup>4</sup>. In these environments, organisms such as kelp bioconcentrate iodine as iodide (I<sup>-</sup>) and  
29 produce volatile iodine species such as methyl iodide<sup>5</sup>. These volatile iodine species contribute to  
30 the destruction of tropospheric ozone (a major greenhouse gas) and aerosol formation at the marine  
31 boundary layer, consequently resulting in cloud formation and other local climatic effects<sup>1,6</sup>.  
32 Despite the global biological and geochemical importance of iodine, little is known about its  
33 biogeochemistry in the ocean<sup>4</sup>. For instance, the biological mechanism accounting for the  
34 unexpected chemical disequilibrium between I<sup>-</sup> and iodate (IO<sub>3</sub><sup>-</sup>) in seawater (I<sup>-</sup>:IO<sub>3</sub><sup>-</sup>  
35 disequilibrium) remains unknown<sup>4</sup>. At the physicochemical conditions of seawater, iodine is most  
36 stable as IO<sub>3</sub><sup>-</sup><sup>7</sup>, yet measurements of IO<sub>3</sub><sup>-</sup> and I<sup>-</sup> in regions with high biological productivity (e.g.,  
37 marine photic zones, kelp forests, or sediments), reveal an enrichment of the I<sup>-</sup> ion beyond what  
38 can be explained through abiotic reduction<sup>7,8</sup>.

39 Among numerous explanations proposed for I<sup>-</sup> enrichment, microbial IO<sub>3</sub><sup>-</sup> reduction is particularly  
40 compelling. The high reduction potential (IO<sub>3</sub><sup>-</sup>/I<sup>-</sup>  $E_h = 0.72V$  at pH 8.1)<sup>7,9</sup> makes IO<sub>3</sub><sup>-</sup> an ideal  
41 electron acceptor for microbial metabolism in marine environments. Early studies indicated

42 common microorganisms such as *Escherichia coli* and *Shewanella putrefaciens*, reduce  $\text{IO}_3^-$  to  $\text{I}^-$   
43 <sup>9,10</sup>. Subsequent studies associated this metabolism with the inadvertent activity of DMSO  
44 respiratory reductase enzymes in marine environments, along with specific enzymes (i.e.,  
45 perchlorate reductase, nitrate reductase) that reduce  $\text{IO}_3^-$  *in vitro* <sup>9,11,12</sup>. However, there is little  
46 evidence that organisms hosting these enzymes are capable of growth by  $\text{IO}_3^-$  reduction. While  
47 inadvertent  $\text{IO}_3^-$  reduction might be mediated by marine bacteria possessing DMSO reductases,  
48 until recently, no definitive evidence existed that global  $\text{IO}_3^-$  reduction is a microbially assisted  
49 phenomenon.

50 In support of a microbial role for the observed  $\text{I}^-:\text{IO}_3^-$  disequilibrium, previous studies  
51 demonstrated that at least one member each of the common marine genera *Pseudomonas* and  
52 *Shewanella* are capable of  $\text{IO}_3^-$  reduction<sup>12-14</sup>. More recently,  $\text{IO}_3^-$  reduction by *Pseudomonas* sp.  
53 strain SCT was associated with a molybdopterin oxidoreductase closely related to arsenite  
54 oxidase<sup>14</sup>. As part of this work, a dedicated biochemical pathway was proposed involving two  
55 peroxidases associated with a heterodimeric  $\text{IO}_3^-$  reductase (Idr)<sup>14</sup>. The putative model proposes a  
56 four-electron transfer mediated by Idr, resulting in the production of hydrogen peroxide and  
57 hypoiodous acid<sup>14</sup>. Two peroxidases detoxify the hydrogen peroxide while a chlorite dismutase  
58 (Cld) homolog dismutates the hypoiodous acid into  $\text{I}^-$  and molecular oxygen, which is  
59 subsequently reduced by the organism<sup>14</sup>. The proposed pathway involving a molecular  $\text{O}_2$   
60 intermediate is analogous to canonical microbial perchlorate respiration<sup>15</sup>. By contrast, Toporek *et*  
61 *al.*<sup>18</sup> using the  $\text{IO}_3^-$  respiring *Shewanella oneidensis* demonstrated the involvement of a multiheme  
62 cytochrome not found in *Pseudomonas* sp. strain SCT suggesting an alternative DIR pathway. The  
63 disparate mechanisms underscore the potential diversity of  $\text{IO}_3^-$  respiratory processes. As such,  
64 identification of additional DIR microorganisms (DIRM) would clarify which genes are required  
65 for this metabolism and enable identification of  $\text{IO}_3^-$  respiratory genes in metagenomes.

66 With this as a primary objective, we identified a novel marine DIRM, *Denitromonas*  
67 *iodocrescerans* strain IR-12, *sp. nov.*, that obtained energy for growth by coupling  $\text{IO}_3^-$  reduction  
68 to acetate oxidation. Taxonomic analysis placed this organism in the *Denitromonas* genus  
69 commonly associated with marine environments<sup>19</sup>. We used comparative genomics to identify the  
70 core genes involved in  $\text{IO}_3^-$  respiration, which formed a distinct mobile genomic island. Reverse  
71 genetics, physiology, and comparative genomic data were used to propose a new model for DIR,  
72 with a confirmed role for a molybdopterin-dependent  $\text{IO}_3^-$  reductase (IdrAB)<sup>14</sup>. A phylogenetic  
73 analysis was used to establish the distribution of this metabolism across the tree of life and measure  
74 the degree to which the genomic island is subject to horizontal gene transfer. Finally, metagenomic  
75 analysis identified the *idrA* gene in the Tara oceans datasets, enabling the correlation of DIR  
76 populations with ocean chemistry. These results together enabled the proposed model for the  
77 global distribution of the DIR metabolism and the ecology of the microorganisms involved.

78

## 79 **Results and discussion**

### 80 **Isolation of *D. iodocrescerans***

81 *D. iodocrescerans* was isolated under anoxic conditions from estuarine sediment samples by  
82 selective enrichment followed by single colony isolation on agar plates. Analysis of the 16S rRNA

83 indicated an axenic culture composed of a single phylotype (strain IR12) belonging to the  
84 *Denitromonas* genus in the beta proteobacteria identical to an uncultured *Denitromonas* clone from  
85 a metagenomic sample (GenBank: KF500791.1) (Figure 1A). The closest cultured relatives were  
86 *D. indolicum* strain MPKc<sup>20</sup> (GenBank: AY972852.1, 99.46% similarity) and *D. aromaticus*  
87 (GenBank: AB049763.1, 99.40% similarity). Morphologically, strain IR12 is a rod-shaped motile  
88 cell 1-2 μm long and 0.5 μm diameter with a single polar flagellum (Figure 1B). Based on its  
89 phylogenetic affiliation, morphology, and metabolism (described below) we propose that strain  
90 IR12 represents a new species in the *Denitromonas* genus with the epithet *D. iodocrescerans*.

91

## 92 **Physiology and energetics of *D. iodocrescerans***

93 Cells of *D. iodocrescerans* grew on basal medium with acetate and IO<sub>3</sub><sup>-</sup> as the sole electron donor  
94 and acceptor, respectively (Figure 1C and D). Ion chromatography and growth studies revealed  
95 that IO<sub>3</sub><sup>-</sup> was quantitatively reduced to I<sup>-</sup> with concomitant cell density increase. No growth or  
96 acetate consumption occurred in the absence of IO<sub>3</sub><sup>-</sup>. Similarly, no IO<sub>3</sub><sup>-</sup> reduction occurred in the  
97 absence of acetate or in heat killed controls. These results indicated that IO<sub>3</sub><sup>-</sup> reduction was  
98 enzymatically mediated coupled to acetate oxidation and growth. Acetate-free control cultures  
99 reduced micromolar amounts of IO<sub>3</sub><sup>-</sup> (114 ± 34 μM, mean ± standard deviation, n=3) which was  
100 attributable to residual acetate carried over from the inoculum (**Error! Reference source not**  
101 **found.**). *D. iodocrescerans* consumed 2.46 ± 0.499 mM IO<sub>3</sub><sup>-</sup> (mean ± standard deviation, n=3)  
102 while oxidizing 2.86 ± 0.427 mM acetate (mean ± standard deviation, n=3) with a final optical  
103 density (OD<sub>600</sub>) increase of 0.109. This is equivalent to an average stoichiometry of 0.86 mol IO<sub>3</sub><sup>-</sup>  
104 per mol acetate. The morphological consistency between *D. iodocrescerans* and *E. coli*, suggests  
105 that an OD<sub>600</sub> increase of 0.39 is equivalent to 1 gram of cell dry weight<sup>21</sup> and that ~50% of cell  
106 dry weight is comprised of carbon<sup>22</sup>. Using these numbers, the corrected stoichiometry accounting  
107 for acetate incorporation into cell mass is 93% of the theoretical value according to:

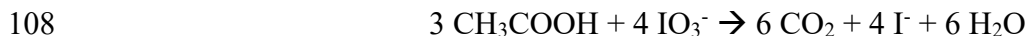

109 Our calculations indicate that 30.72% of total carbon is assimilated into biomass while the  
110 remaining is respired. Such a result is typical for highly oxidized electron acceptors such as  
111 oxygen, nitrate, or perchlorate<sup>15,23</sup>. In support of this, the calculated Gibb's free energy and the  
112 change in enthalpy for the reduction of IO<sub>3</sub><sup>-</sup> per mole of electrons transferred is -115 kJ/mol e<sup>-</sup> and  
113 -107 kJ/mol e<sup>-</sup> respectively<sup>24</sup>. These values place the energy provided through IO<sub>3</sub><sup>-</sup> respiration akin  
114 to that of perchlorate respiration (ClO<sub>4</sub><sup>-</sup>/Cl<sup>-</sup>, E<sup>o'</sup> = +0.797 V)<sup>15</sup>, and between that of aerobic  
115 respiration (O<sub>2</sub>/H<sub>2</sub>O, E<sup>o'</sup> = +0.820 V) and nitrate reduction (NO<sub>3</sub><sup>-</sup>/N<sub>2</sub>, E<sup>o'</sup> = +0.713 V)<sup>25</sup>. This  
116 suggests a similar degree of carbon assimilation would be expected for IO<sub>3</sub><sup>-</sup> respiration<sup>23</sup>.

117

## 118 **DIR is molybdate dependent**

119 The reduction of oxyanions like IO<sub>3</sub><sup>-</sup>, such as bromate, chlorate, perchlorate, and nitrate, is  
120 typically catalyzed by enzymes belonging to the DMSO reductase superfamily of molybdopterin  
121 oxidoreductases<sup>26</sup>. These enzymes require molybdenum as a cofactor in order to donate two

122 electrons at a time to the receiving molecule<sup>27</sup>. To determine if phenotypic IO<sub>3</sub><sup>-</sup> reduction was  
123 molybdenum-dependent, we passaged *D. iodocrescerans* six times in aerobic, molybdate-free  
124 minimal media to remove any trace molybdenum as described in Chaudhuri *et al*<sup>28</sup>. As expected,  
125 and similarly to observations with perchlorate reducing microorganisms<sup>28</sup>, omitting molybdenum  
126 from the oxic medium did not affect the aerobic growth of *D. iodocrescerans* (data not shown). In  
127 contrast, no growth or IO<sub>3</sub><sup>-</sup> reduction was observed when these cells were passaged into  
128 molybdenum-free anoxic media with IO<sub>3</sub><sup>-</sup> as the electron acceptor (Figure 1E). When 0.1mM  
129 sodium molybdate was added into the non-active cultures at 14 hours post inoculation, growth and  
130 IO<sub>3</sub><sup>-</sup> resumed (Figure 1E). These results demonstrate that IO<sub>3</sub><sup>-</sup> respiration by *D. iodocrescerans* is  
131 molybdenum dependent and are consistent with the involvement of a DMSO oxidoreductase in  
132 IO<sub>3</sub><sup>-</sup> reduction<sup>28</sup>.

133

### 134 **Core genes required for DIR**

135 To identify the genes required for IO<sub>3</sub><sup>-</sup> respiration we performed a comparative genomic analysis  
136 between the genomes of the IO<sub>3</sub><sup>-</sup> respiring species (*D. iodocrescerans* and *Pseudomonas* sp. SCT),  
137 and the non-IO<sub>3</sub><sup>-</sup> respiring close relatives (*D. halophilus* SFB-1, and *Pseudomonas* sp. CAL).  
138 Additionally, *Pseudomonas* and *Denitromonas* form phylogenetically distinct genera  
139 (*Gammaproteobacteria* and *Betaproteobacteria*, respectively), reducing the likelihood of shared  
140 gene content<sup>29</sup>. We surmised that DIRM must share a unique gene (or set of genes) that enables  
141 IO<sub>3</sub><sup>-</sup> reduction. This comparison identified 26 genes uniquely shared by the two DIRM and not  
142 found in the closely related non-IO<sub>3</sub><sup>-</sup> respiring species (Figure 2A; Table S2). Four of these genes  
143 were present in a gene cluster that contained genes for alpha and beta subunits of a DMSO  
144 reductase family molybdopterin enzyme related to arsenite oxidase (AioAB)<sup>30</sup> supporting our  
145 result of a molybdenum dependency for this metabolism. The remaining two genes in the cluster  
146 were closely related to cytochrome C peroxidases *ccp1* and *ccp2*, possibly involved electron  
147 shuttling and oxidative stress responses<sup>31,32</sup>. These four genes were similar to those identified by  
148 Yamazaki *et al.* under the proposed nomenclature *idrA*, *idrB*, *idrP<sub>1</sub>*, *idrP<sub>2</sub>* for *Pseudomonas* sp.  
149 SCT<sup>14</sup> (Figure 2B). A SignalP analysis showed that *idrP<sub>1</sub>* and *idrP<sub>2</sub>* possessed a signal sequence  
150 for periplasmic secretion via the Sec pathway, while *idrB* used the Tat pathway<sup>33</sup>. By contrast  
151 *idrA* did not have a signal peptide sequence, suggesting its protein product is co-transported with  
152 IdrB into the periplasm<sup>34</sup>. Based on this evidence, we concluded that dissimilatory IO<sub>3</sub><sup>-</sup> reduction  
153 in *D. iodocrescerans* occurs entirely in the periplasm, consistent with the observation by Amachi  
154 *et al.* that associated IO<sub>3</sub><sup>-</sup> reductase activity in the periplasmic fractions of *Pseudomonas* strain  
155 SCT<sup>13</sup>. Notably, the gene cluster lacked a quinone oxidoreductase suggesting that *D.*  
156 *iodocrescerans* involves the expression of a non-dedicated quinone oxidoreductase.

157 Evidence associating IdrAB to DIR, currently relies on the IO<sub>3</sub><sup>-</sup> consuming activity of crude cell  
158 extracts of *Pseudomonas* strain SCT and differential expression of *idrABP<sub>1</sub>P<sub>2</sub>* under IO<sub>3</sub><sup>-</sup> reducing  
159 conditions<sup>14</sup>. To validate the association between these genes and DIR in *D. iodocrescerans*, we  
160 developed a genetic system to perform targeted knockouts (see Table S1 and supplemental  
161 methods for details). The *idrA* gene was targeted since its associated molybdenum cofactor  
162 ultimately mediates the reduction of the oxyanion<sup>26</sup>. Upon introduction of an in-frame deletion at  
163 the *idrA* locus, the organism was incapable of growth via IO<sub>3</sub><sup>-</sup> respiration (Figure 2C) while growth  
164 under oxic conditions remained unimpaired. Complementation of *idrA* on a low copy number

165 vector (pVR065) restored the  $\text{IO}_3^-$  respiring phenotype demonstrating that the *idrA* gene is a  
166 prerequisite to enable  $\text{IO}_3^-$  respiration (Figure 2C). Our identification of a second DIRM, in  
167 addition to *Pseudomonas* strain SCT, with an IdrAB suggests that  $\text{IO}_3^-$  reduction requires a  
168 specialized molybdopterin oxidoreductase, and that other molybdopterin oxidoreductases in the  
169 genome cannot rescue the phenotype. Furthermore, our work demonstrates a distinct difference  
170 from  $\text{IO}_3^-$  reduction by the multiheme cytochrome in *Shewanella* and suggests that the ability to  
171 reduce  $\text{IO}_3^-$  may have evolved at least twice independently.

172

### 173 **An alternative DIR model**

174 The current model for  $\text{IO}_3^-$  respiration by *Pseudomonas* strain SCT proposes the donation of  
175 electrons from the quinone pool via a cytochrome c to IdrAB, to initiate reduction of  $\text{IO}_3^-$  to HIO  
176 and  $\text{H}_2\text{O}_2$ .  $\text{H}_2\text{O}_2$  is reduced to  $\text{H}_2\text{O}$  by the peroxidases IdrP<sub>1</sub> and IdrP<sub>2</sub>, while a chlorite dismutase  
177 (Cld)-like enzyme converts HIO to  $\text{I}^-$  and  $\frac{1}{2}\text{O}_2$ , a catalytic function that has never been  
178 demonstrated for Cld or Cld-like proteins<sup>14</sup>. The resultant oxygen is then further respired to  $\text{H}_2\text{O}$   
179 by a terminal oxygen reductase. The putative participation of a Cld-like protein was based on  
180 expression data rather than empirically determined activity<sup>14</sup>. Furthermore, comparative genomics  
181 does not support the general involvement of Cld in  $\text{IO}_3^-$  respiration, as *cld* is never co-located with  
182 the IRI and is notably absent from all but two of the 145 putative DIRM genomes identified in  
183 NCBI GenBank (see below) including the genome of *D. iodocrescerans*.

184 Since *D. iodocrescerans* genome lacks *cld*-like genes, we propose that the primary mechanism of  
185  $\text{IO}_3^-$  respiration by this organism relies on the complex and reactive chemistry of iodine  
186 oxyanions<sup>35</sup> and that the peroxidases IdrP<sub>1</sub> and IdrP<sub>2</sub> serve a critical detoxification role for  
187 inadvertent oxidants generated rather than being central components of the pathway itself. In the  
188 *D. iodocrescerans* model (Figure 3A), IdrAB accepts electrons from cytochrome c551, and  
189 performs a four-electron transfer, similarly to the mechanism of perchlorate reductase (Pcr)<sup>36</sup>, with  
190 a resultant production of the chemically unstable intermediate hypiodous acid (HIO). This  
191 intermediate then undergoes abiotic disproportionation to yield  $\text{I}^-$  and  $\text{IO}_3^-$  as reported in alkaline  
192 aquatic environments<sup>16,37</sup>, and is simplistically represented by the following equation:

193

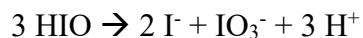

194 The resultant  $\text{IO}_3^-$  subsequently cycles back into the reductive pathway. In this manner, the cell  
195 completes the 6-electron reduction of  $\text{IO}_3^-$  to  $\text{I}^-$  without invoking a Cld-like enzyme with putative  
196 capacity to dismutate  $\text{IO}^-$  to  $\text{I}^-$  and  $\text{O}_2$ . This model is similar to the cryptic model for some species  
197 of perchlorate reducing microorganism which rely on the chemical reactivity of the unstable  
198 pathway intermediate chlorite ( $\text{ClO}_2^-$ ) with reduced species of iron or sulfur to prevent toxic  
199 inhibition<sup>36,38</sup>. We propose that the initial reduction of  $\text{IO}_3^-$  at the IdrA inadvertently produces low  
200 levels of incidental toxic  $\text{H}_2\text{O}_2$ . This is analogous to the production of hypochlorite ( $\text{ClO}^-$ ) by  
201 respiratory perchlorate reducing microorganisms during respiration of perchlorate or chlorate<sup>39,40</sup>.  
202 To protect themselves from this reactive chlorine species, perchlorate respiring organisms have  
203 evolved a detoxifying mechanism based on redox cycling of a sacrificial methionine rich peptide<sup>40</sup>.  
204 In the *D. iodocrescerans* model for  $\text{IO}_3^-$  respiration the cytochrome c peroxidases play the critical  
205 detoxification role against inadvertent  $\text{H}_2\text{O}_2$  production, rather than a central role for the reductive

206 pathway as proposed for *Pseudomonas* strain SCT<sup>14</sup> (Figure 3A). Such a model is not only  
207 parsimonious with the predicted biochemistries and abiotic reactivities of the proteins and iodine  
208 oxyanions involved but is also consistent with the micromolar quantities of H<sub>2</sub>O<sub>2</sub> observed by  
209 Yamazaki *et al.* during the reduction of millimolar quantities of IO<sub>3</sub><sup>-</sup> by *Pseudomonas* strain SCT<sup>14</sup>.

210

## 211 Evolutionary history of DIR

212 Core genes for DIR were used to define the phylogenetic distribution of this metabolism. Close  
213 homologs to the catalytic subunit of IdrA were identified among genomes in NCBI GenBank. A  
214 phylogenetic tree of the DMSO reductase family (Figure 4A and 4B) confirms previous results  
215 indicating that arsenite oxidase alpha subunit (AioA) is the most closely related characterized  
216 enzyme to IdrA<sup>14</sup>. The extent of the IdrA clade was difficult to define because IdrA from *D.*  
217 *iodocrescerans* and *Pseudomonas* sp. SCT are closely related. To determine whether more IdrA  
218 homologs in this clade function as IO<sub>3</sub><sup>-</sup> reductases or arsenite oxidases, we performed a gene  
219 neighborhood analysis looking at the 10 genes both upstream and downstream of either the *idrA*  
220 or *aioA* locus and clustered them using MMseqs2<sup>41</sup> (Figure 5). We observed a clear distinction in  
221 neighborhood synteny between genes mostly closely to *idrA* versus those most closely related to  
222 *aioA*. All neighborhoods in the *idrA* clade showed conserved synteny at *idrABP<sub>1</sub>P<sub>2</sub>* (Figure 5),  
223 whereas organisms with an AioA, showed an alternative gene structure, notably missing the  
224 cytochrome c peroxidases. Based on this pattern, all organisms possessing *idrABP<sub>1</sub>P<sub>2</sub>* genes are  
225 likely DIRM. The outgroups of IO<sub>3</sub><sup>-</sup> reductase in this phylogeny are homologs found in  
226 *Halorubrum* spp., which are known to oxidize arsenite<sup>42</sup>, and a *Dehalococcodia* bacterium  
227 (GCA\_002730485.1), which also lacks the cytochrome c peroxidases in its gene neighborhood  
228 (Figure 5). Further research into these proteins may provide more information on the transition  
229 from arsenite oxidase to IO<sub>3</sub><sup>-</sup> reductase.

230 Genes mediating IO<sub>3</sub><sup>-</sup> reduction were identified in 145 genomes from bacteria in the  
231 *Alphaproteobacteria*, *Betaproteobacteria*, and *Gammaproteobacteria*. Deeper branching  
232 members included members of *Planctomycetaceae* and several others belonging to the Candidate  
233 Phyla Radiation group such as, *Ca. Rokubacteria*, *Ca. Lindowbacteria*, and NC10 (Figure 4B)<sup>43-</sup>  
234 <sup>45</sup>. DIR seemed most prevalent in the phylum *Proteobacteria*, which is a pattern that has been  
235 observed for some other rare metabolisms<sup>46</sup>. The discordance between the taxonomy of the host  
236 organisms and the phylogeny of IdrA (Figure 4B; Figure S1)<sup>47</sup> suggested that DIR is a horizontally  
237 transferred metabolism. For example, IdrA in the *Gammaproteobacterium Pseudomonas* sp. SCT  
238 was most closely related to IdrA in *Betaproteobacteria* such as *Azoarcus* sp. DN11. Additional  
239 evidence for horizontal gene transfer in individual genomes included insertion sites at the 3' end  
240 of tRNAs, a skew in GC content, and association with other horizontally transferred genes<sup>48,49</sup>. In  
241 *D. iodocrescerans*, there was no significant GC skew, but we observed a tRNA<sup>Gly</sup> roughly 72 kbp  
242 downstream of the *idrABP<sub>1</sub>P<sub>2</sub>* locus. While we did not detect inverted repeats, Larbig *et al.*  
243 previously demonstrated an integration site in *P. stutzeri* at tRNA<sup>Gly</sup><sup>50</sup>. Additionally, numerous  
244 heavy metal resistance markers, like *mer* and *cus* genes, were found near the *idrABP<sub>1</sub>P<sub>2</sub>* locus (1.2  
245 kbp and 22 kbp away respectively), further suggesting horizontal transfer<sup>48,51,52</sup>. A method to detect  
246 genomic islands in complete genomes predicted the *idrABP<sub>1</sub>P<sub>2</sub>* locus to be its own 5.8 kbp genomic  
247 island in *Azoarcus* sp. DN11, which has a complete genome and a closely related IdrA. Therefore,  
248 while there is poor conservation of genes surrounding *idrABP<sub>1</sub>P<sub>2</sub>* and questions remain about its

249 recent evolution, the high degree of conservation of *idrABP<sub>1</sub>P<sub>2</sub>* locus itself and the phylogenetic  
250 pattern of inheritance support its description as an iodate reduction genomic island (IRI) that is  
251 subject to horizontal gene transfer. In addition to the perchlorate reduction genomic island (PRI)<sup>46</sup>  
252 the IRI represents one of the few respiratory genomic islands known that crosses large  
253 phylogenetic boundaries (class, order, and family).

254

## 255 **Distribution of DIR populations in global oceans**

256 Many of the organisms with genes for DIR were identified in diverse marine habitats where IO<sub>3</sub><sup>-</sup>  
257 reduction is suspected to occur (Table 3). For example, *Litorimicrobium taeanense* is an aerobic,  
258 non-motile, *Alphaproteobacterium* isolated from a sandy beach in Taean, South Korea<sup>53</sup>. Other  
259 organisms such as *Endozoicomonas sp.* OPT23 and *Litoreibacter ascidiaceicola* were isolated  
260 from marine animals such as the intertidal marine sponge (*Ophlitaspongia papilla*) and the sea  
261 squirt (*Halocynthia aurantium*), respectively<sup>54,55</sup>. Additionally, organisms known to accumulate  
262 iodine, such as algae<sup>56</sup> are associated with these bacteria as is the case with the bacterium  
263 *Rhodophyticola porphyridii* and the red algae *Porphyridium marinum*<sup>57</sup>. To investigate this marine  
264 prevalence further we used the *idrA* subunit as a marker gene to determine DIRM distribution  
265 across the Tara Oceans metagenome dataset. Our approach also identified the read abundance  
266 mapping to these unique IdrA hits at the different sites by using the transcripts per million (TPM)  
267 method for read quantification<sup>58,59</sup>. With this method, the number of unique IdrA hits was directly  
268 proportional to the number of reads mapped to the hits (Figure 6A and 6B). In general, locations  
269 with few unique IdrA hits lacked reads mapping to IdrA (Figure 6B). We observed that 77%  
270 (74/96) of the hits arose from the mesopelagic zone at an average depth of about 461 meters (range  
271 270m-800m) across identified stations (Figure S2). The remaining hits arose predominantly in  
272 epipelagic zones, such as the deep chlorophyll maximum in 21% of cases (20/96) and far fewer  
273 hits were observed in the mixed layer (1/96) or the surface water layer (1/96).

274

275 Although the presence of *idrA* exhibited some variability in depth, a geochemical feature common  
276 to all these hits was low oxygen concentrations. The vast majority of hits mapped to well-  
277 documented oxygen minimal zones in the Arabian Sea<sup>60,61</sup> and the Eastern Tropical Pacific<sup>62-64</sup>.  
278 Similarly, the North Pacific Subtropical and Polar Front (MRGID:21484) and the North Pacific  
279 Equatorial Countercurrent provinces (MRGID:21488) are two Longhurst provinces with OMZs  
280 that stand out in the Western hemisphere. At each of these locations, the median dissolved oxygen  
281 concentration at *idrA* positive locations was consistently lower than the dissolved oxygen  
282 concentrations at *idrA* absent locations (65.24 μmol/kg versus 190.41 μmol/kg; Figure 6E).  
283 Among locations containing more than one *idrA* hit, the average oxygen concentration was about  
284 six times lower (11.03 μmol/kg); however, this average was skewed upward due to one outlier  
285 condition with 18 *idrA* hits (Cumulative TPM of 89.30; Figure S2) occurring at a dissolved oxygen  
286 concentration of 95.4 μmol/kg (TARA\_137\_DCM\_0.22-3). Environments meeting these  
287 conditions were the most common in mesopelagic zones broadly. One notable exception were the  
288 multiple hits at the deep chlorophyll maximum (DCM) at station 137. However, further inspection  
289 of the physical environment at the DCM revealed that this station matched mesopelagic  
290 environments more closely than surface waters or deep chlorophyll maxima. Research from  
291 Farrenkopf *et al.* indicated that bacteria are responsible for IO<sub>3</sub><sup>-</sup> reduction in oxygen minimum  
292 zones<sup>12,65</sup>. Further, Saunders *et al.* showed a preferential expression of AioA-like genes in the

293 Eastern Pacific oxygen minimum zones, which our evidence now suggests are  $\text{IO}_3^-$ -reductases  
294 (IdrA)<sup>30</sup>.

295 To test whether locations with *idrA* possessed a unique chemical signature, we ran a principal  
296 component analysis using the variables associated with sample environments. Together the first  
297 two components of these geochemical variables explained 70.66% of the variance observed  
298 between *idrA* present and *idrA* absent samples. We determined that *idrA* presence was correlated  
299 most strongly with increased nitrate, phosphate, and silicate concentrations (Figure 6C-E).  
300 Additionally, *idrA* presence was negatively correlated with dissolved oxygen concentrations  
301 (Figure 6C-E). Such an observation is atypical for highly productive nitrate and phosphate depleted  
302 OMZs<sup>60,66,67</sup>. A possible explanation for this observation is that DIRM inhabit a unique niche  
303 above OMZs where residual  $\text{O}_2$  prevents *fnr*-dependent expression of nitrate reductase<sup>68</sup>.  
304 Organisms in these environments could potentially use  $\text{IO}_3^-$  as an alternative electron acceptor.  
305 Excess phosphorous in these zones seemingly serves as a proxy indicator of lower overall  
306 productivity, and potentially reflects the limiting concentration of  $\text{IO}_3^-$  and oxygen for biomass  
307 accumulation<sup>4,23</sup>. Our explanation corroborates results from Farrenkopf *et al.* that shows an  $\text{I}^-$   
308 maximum occurring at the boundary of the OMZ<sup>61</sup>, but further studies into the biochemistry of  
309  $\text{IO}_3^-$  reduction under suboxic conditions and the contribution of DIRM to  $\text{I}^-$  formation at this  
310 transition zone are necessary to undeniably link the  $\text{I}^-$  maximum with the presence of *idrA* directly.

311

## 312 **Significance**

313 Here we describe a new organism, *Denitromonas iodocrescerans*, that grows by  $\text{IO}_3^-$  respiration  
314 which is mediated by a novel molybdenum dependent DMSO reductase. The conserved core genes  
315 associated with DIR and the chemistry of iodine oxyanions are consistent with a hybrid enzymatic-  
316 abiotic pathway by which IdrAB reduces  $\text{IO}_3^-$  to  $\text{HIO}$ , which abiotically disproportionates to  $\text{I}^-$  and  
317  $\text{IO}_3^-$ <sup>16,37</sup>. In this model, cytochrome c peroxidase like proteins (IdrP<sub>1</sub> and IdrP<sub>2</sub>) detoxify reactive  
318  $\text{H}_2\text{O}_2$  byproducts. Genes for this metabolism are part of a highly conserved  $\text{IO}_3^-$  reduction genomic  
319 island (IRI). Organisms harboring the IRI belong to phylogenetically distinct taxa, many of which  
320 are associated with marine sediments or multicellular hosts, suggesting that DIR is a horizontally  
321 transferred metabolism across marine ecosystems over geologic time. The abundance of IdrA  
322 genes across ocean metagenomes strongly correlates to oxygen minimum zones, indicating a niche  
323 for this metabolism in low-oxygen, high nitrate habitats across the ocean, from sediments to  
324 oxygen-minimum zones to the surfaces of multicellular organisms. In high-nitrate, low-oxygen  
325 conditions, bacteria with the IRI can use  $\text{IO}_3^-$  as an electron acceptor to obtain energy from the  
326 oxidation of organic matter.  $\text{IO}_3^-$  is constantly replenished by the chemical oxidation of  $\text{I}^-$ , so DIRM  
327 do not rely on other organisms for their substrate.  $\text{IO}_3^-$  is typically scarce ( $0.45\mu\text{M}$  in seawater)<sup>4</sup>,  
328 so DIRM must compete with  $\text{IO}_3^-$  reduction by chemical reductants and by inadvertent biological  
329 activity, such as by algae, that contribute to the relative depletion of  $\text{IO}_3^-$  in those waters<sup>7,61,65,69,70</sup>.  
330 By analogy, perchlorate-reducing bacteria, which are common but sparse due to low natural  
331 abundance of perchlorate<sup>71</sup>, may provide further insight into the ecology of DIRM broadly. The  
332 rarity of  $\text{IO}_3^-$  reduction genes among bacteria despite the ability of the metabolism to be  
333 horizontally transferred likely reflects the evolutionary constraints of growth by DIR. Intriguingly,  
334 one organism, *Sedimenticola thiotaurini*, seemingly possesses both perchlorate and  $\text{IO}_3^-$  reduction  
335 pathways, presenting future opportunities to study the ecology of these metabolically versatile



336 microorganisms<sup>72</sup>. Moreover, organisms such as *Vibrio spp.* and *Moritella spp.* show some degree  
337 of vertical transfer for the IRI throughout recent evolutionary history, indicating possible niches  
338 among sea fauna and cold environments where DIR is biogeochemically favorable. Future studies  
339 addressing the affinity of IdrAB for IO<sub>3</sub><sup>-</sup> may also shed light on how DIRM thrive at such low  
340 environmental concentrations. Additionally, further research into the chemistry of iodine  
341 oxyanions may provide insight on the intermediates of IO<sub>3</sub><sup>-</sup> reduction. Addressing these open  
342 questions may ultimately shed light on new potential niches for DIRM and provide a role for these  
343 organisms in potentiating iodine redox cycling globally.

344

### 345 **Description and Phylogeny of *Denitromonas iodocrescerans* sp. nov. strain IR-12<sup>T</sup>**

346 *Denitromonas iodocrescerans* (i.o.do.cre'scer.ans) Chem. n. *iodo* as it pertains to iodine; L. pres.  
347 part. *crescerans* for growing; N.L. pres. part. *iodocrescerans* iodine-growing.

348 *D. iodocrescerans* is a facultatively anaerobic chemoorganotroph, gram negative, rod-shaped, 1.5-  
349 2.0 μM long by 0.6-0.7 μM wide, and motile by means of a unipolar flagellum (Figure 1B).  
350 Colonies are circular, smooth, and range in color from transparent to an opaque/whitish-sky blue  
351 color after 48 hours of growth on R2A agar at 30°C. Extended growth on R2A agar (96 or more  
352 hours) results in a light coral pink colony color. *D. iodocrescerans* grows by oxidizing D-glucose,  
353 lactate, or acetate with concomitant reduction of oxygen (O<sub>2</sub>), nitrate (NO<sub>3</sub><sup>-</sup>), or iodate (IO<sub>3</sub><sup>-</sup>). It  
354 grows on up to 4 mM of iodate with an optimum at 2 mM. Additionally, the organism can tolerate  
355 up to 6.25 mM of iodide. Growth occurs between 20-30°C with an optimum of 30°C. It grows at  
356 a range of 0-5% salinity with an optimum of 3% NaCl on minimal media. *D. iodocrescerans* has  
357 an innate resistance to tetracycline (10 μg/μL) and chloramphenicol (25 μg/μL) but is sensitive to  
358 kanamycin, which inhibits growth at concentrations as low as 5 μg/μL.

359 The genome of *D. iodocrescerans* is 5,181,847 bp (average coverage 64.2x) with 4697 CDS, a  
360 G+C content of 66.54%, 57 tRNAs, one tmRNA, one CRISPR, and a single plasmid 81,584 bp  
361 long whose function remains unclear. The full genome has been deposited in GenBank (BioProject  
362 ID PRJNA683738) currently consisting of 202 contigs. Phylogenetically, *D. iodocrescerans*  
363 belongs to the class *Betaproteobacteria*; however, its phylogeny beyond this class becomes less  
364 clear. The 16S rRNA locus suggests that *D. iodocrescerans* is a subclade of *Azoarcus*, which  
365 belongs to the family *Zoogloeaceae*<sup>73</sup>. However, the NCBI database suggests that the genus  
366 *Denitromonas* belongs to the family *Rhodocyclaceae*.

367 The type strain of *Denitromonas iodocrescerans*, IR-12<sup>T</sup>, was enriched from marine sediment from  
368 the Berkeley Marina in the San Francisco Bay during the Fall of 2018 (further details explained in  
369 methods below). The strain has been deposited in the American Type Culture Collection (ATCC  
370 XXXXX).

371

### 372 **Acknowledgements**

373 The authors acknowledge Mariana Shalit, Dylan Dang, Jessica Kretschmer, Rachael Peng,  
374 Mitchell Thompson, and Hans Carlson for lab support and advice throughout the project. Funding

375 for research on iodate in the Coates lab was provided to VRU through the NSF GRFP Base Award:  
376 DGE1752814.

377

## 378 **Conflict of Interest**

379 The authors declare that they have no conflict of interest with the research presented in this  
380 article.

381

## 382 **Contributions**

383 JDC guided the research. VRU and KL performed all physiology experiments and measurements.  
384 VRU performed all cloning experiments. VRU and TPB performed the comparative genomic  
385 analysis and phylogenetic analyses. VRU and ZH performed the analysis of the TARA Oceans  
386 data. VRU and JDC developed the model. VRU wrote the draft manuscript and created the figures  
387 with guidance from JDC. All authors contributed to data analysis, reviewed the manuscript, and  
388 approved of its publication.

389

## 390 **Methods**

### 391 Media, chemicals, and culture conditions

392 Anaerobic enrichment cultures from marine environments were grown at 30°C using a minimal  
393 media containing the following per liter: 0.54g NH<sub>4</sub>Cl, 0.14g KH<sub>2</sub>PO<sub>4</sub>, 0.20g MgCl<sub>2</sub> · 6 H<sub>2</sub>O,  
394 0.14g Na<sub>2</sub>SO<sub>4</sub> · 10 H<sub>2</sub>O, 20.0g NaCl, 0.24g Na<sub>2</sub>MoO<sub>4</sub> 0.20g, and 2.5g NaHCO<sub>3</sub> with an added  
395 vitamin mix and mineral mix. Oxygen was removed from the media and bottles were dispensed in  
396 an 80%N<sub>2</sub>/20%CO<sub>2</sub> atmosphere. Anaerobic subcultures for isolation were grown in Artificial Pore  
397 Water (APM) medium at 30°C (30.8g NaCl, 1.0g NH<sub>4</sub>Cl, 0.77g KCl, 0.1g KH<sub>2</sub>PO<sub>4</sub>, 0.20g  
398 MgSO<sub>4</sub>·7H<sub>2</sub>O, 0.02g CaCl<sub>2</sub> · 2 H<sub>2</sub>O, 7.16g HEPES, along with vitamin and mineral mixes. A  
399 post sterile addition of 34.24mL 0.4M CaCl<sub>2</sub> and 26.07mL 2M MgCl<sub>2</sub> · 6H<sub>2</sub>O was added to all  
400 APM media. Conditions with lactate, acetate, iodate, and nitrate all used the sodium salts of these  
401 compounds. Conditions without molybdenum omitted Na<sub>2</sub>MoO<sub>4</sub> from the mineral mixes. Aerobic  
402 cultures were all grown either on APM, R2A (HiMedia, USA), or R2A agar (BD Biosciences,  
403 USA). Kanamycin concentrations when used were at one tenth the standard concentrations on  
404 plates (5 mg/L, Sigma Aldrich, USA) and at one fourth the standard concentration in liquid (12.5  
405 mg/L). All compounds were purchased through Sigma Aldrich (Sigma Aldrich, USA). Growth of  
406 tubes were measured either using the Thermo Scientific™ GENESYS™ 20 or the TECAN  
407 Sunrise™ 96-well microplate reader set at a wavelength of 600 nm. For growth measurements in  
408 Hungate tubes, a special adapter was built to measure the tubes on the GENESYS™ 20. Growth  
409 experiments using the microplate reader were run in an anerobic glove bag.

### 410 Isolation of dissimilatory iodate-reducing bacteria

411 Sediment from the oxic/anoxic boundary layer in the San Francisco Bay estuary (37°86'56.4" N,  
412 -122°30'63.9" W) was added to anaerobic media bottles at 25g/100mL for isolation of  
413 dissimilatory iodate-reducing bacteria. Samples were degassed and amended with acetate and  
414 iodate to enable growth of heterotrophic iodate reducing bacteria. Enrichments that showed iodate  
415 reduction to iodide were then passaged at least five times into fresh minimal media with 10mM  
416 acetate and 2mM iodate. To ensure purity of the passaged enrichment culture, the organism was  
417 plated aerobically onto an agar plate containing the minimal media, and a single colony was  
418 isolated from this plate.

#### 419 Strains and plasmids

420 All plasmids, primers and strains constructed are listed in Table S1. The *E. coli* strain used for  
421 plasmid propagation was XL1-Blue, while WM3064 was used to perform conjugations. Plasmid  
422 pNTPS138, a generous gift from the Kathleen Ryan Lab at UC Berkeley, was used for the SacB  
423 counterselection. Plasmid pBBR1-MCS2 is a low copy expression vector and was used for  
424 complementation experiments. All expression plasmids and deletion vectors were constructed  
425 using the Benchling software suite (San Francisco, USA). Plasmids were assembled either by  
426 Gibson assembly or restriction digestion and ligation using standard procedures. Gibson assembly  
427 was carried out using NEB HiFi 2x Master Mix, and remaining enzymes and master mixes were  
428 ordered from New England Biosciences (NEB, USA). Plasmids were routinely isolated using the  
429 Qiaprep Spin Miniprep kit (Qiagen, USA), and all primers were ordered from Integrated DNA  
430 Technologies (IDT, Coralville, IA). Amplification of DNA for generating assembly products was  
431 performed using Q5 DNA Polymerase 2x Master Mix (NEB, USA) with 3% DMSO.  
432 Amplification of distinct portions of the genome were optimized since most sequences in the iodate  
433 reduction cluster contain at minimum 60% GC content, making amplification relatively  
434 challenging. All *D. iodocrescerans* strains (pre- or post-transformation) were propagated from  
435 glycerol stocks (25% glycerol) stored at -80°C, grown on a plate for up to 72 hours, picked and  
436 then grown for an additional 48-72 hours in liquid R2A. For additional information on performing  
437 transformations and conjugations in *D. iodocrescerans* see supplemental methods.

#### 438 Iodate and iodide quantification

439 A Dionex™ IonPac™ AS25 Anion Exchange Column (Thermo Fischer, USA) was used  
440 exclusively to measure the consumption of iodate and acetate, as well as the production of iodide  
441 in all samples. Briefly, all samples are diluted 1:25 in deionized water and loaded onto the  
442 autosampler for processing. Standards are made by serial dilution starting with 1 mM of the  
443 standard molecule. All samples were run in triplicate. Acetate peaks were consistently detected at  
444 3.6 minutes, iodate peaks were consistently detected at 3.8 minutes, and iodide peaks were  
445 consistently detected at 11.5 minutes at a flow rate of 1mL/min.

#### 446 Genome sequencing, comparative genomics, and phylogenetic analysis

447 Genome sequencing was carried out on an Illumina HiSeq4000 using 150bp paired end reads. The  
448 genome was subsequently assembled using SPAdes 3.9<sup>74</sup> and the assembly graph was assessed for  
449 completion using bandage<sup>75</sup>. The Prokka (version 1.14) pipeline was then used to generate the  
450 genome annotations and the general feature format file (.gff), which allowed for genome  
451 navigation and visualization on the Artemis software (available at [11](http://sanger-</a></p></div><div data-bbox=)

452 [pathogens.github.io](https://pathogens.github.io))<sup>76</sup>. To search for the iodate reduction island, MMseqs2 was used to cluster  
453 homologous proteins in the amino acid FASTA (.faa) files from *D. iodocrescerans*, *P. stutzeri* sp.  
454 SCT, *D. halophilus* SFB-1, and *P. stutzeri* sp. CAL by subfamily<sup>41</sup>. A presence and absence matrix  
455 for each subfamily was generated and represented as a four-way Venn diagram using pyvenn  
456 (<https://github.com/tctianchi/pyvenn>). To identify additional iodate reductase proteins in public  
457 databases, a profile-HMM was constructed using HMMER 3.0 following a multiple sequence  
458 alignment using MUSCLE 3.8 on the molybdopterin oxidoreductase (Pfam\_00384) seed set and  
459 *D. iodocrescerans*/*P. stutzeri* SCT IdrA proteins<sup>77,78</sup>. A separate arsenite oxidase (AioA) profile-  
460 HMM was created using analogous methods. Genomes from high probability HMM hits (threshold  
461 above 640 on <https://www.ebi.ac.uk/Tools/hmmer/search/phmmer>) and BLAST hits were  
462 downloaded from NCBI using ncbi-genome-download ([https://github.com/kblin/ncbi-genome-](https://github.com/kblin/ncbi-genome-download)  
463 [download](https://github.com/kblin/ncbi-genome-download)). Approximately-maximum-likelihood phylogenetic trees were generated using  
464 Fasttree<sup>79</sup> specifying 10,000 resamples and using standard settings for everything else.  
465 Visualization of resultant trees used the ete3 toolkit<sup>80</sup>. To perform the neighborhood frequency  
466 analysis, 10 genes upstream and downstream from the *aioA* or *idrA* locus were extracted from the  
467 associated GenBank files for each genome, and MMseqs2 was used to cluster homologous proteins  
468 into subfamilies<sup>41</sup>. To search for *cld* in the downloaded genomes, a profile-HMM for *cld*,  
469 described previously, was used<sup>81</sup>. Frequency was calculated as number of genomes in possession  
470 of a cluster divided by the total number of genomes. Projections of this data were drawn using a  
471 custom Python 3.7 script. All tanglegram analyses used Dendroscope to load trees for processing  
472 and visualization<sup>47</sup>.

#### 473 Distribution of iodate reductase in ocean metagenomes

474 The profile-HMM for iodate reductase (described above) was used to search all 40 million non-  
475 redundant open reading frames from the 243-sample Tara oceans dataset. Open reading frames  
476 were downloaded (available from <https://www.ebi.ac.uk/ena/data/view/PRJEB7988>) and  
477 translated to amino acid sequences using custom BioPython code<sup>82,83,84</sup>. The amino acid sequences  
478 in the 0.22-micron and 0.45-micron range were then searched for hits using the IdrA profile-HMM  
479 set at a threshold score of 640. Hits were then grouped by station for further analysis. Reads were  
480 mapped to scaffolds with Bowtie2<sup>85</sup> and reads were counted using SAMtools<sup>86</sup>. Read abundance  
481 mapping to these unique IdrA hits were quantified by using the transcripts per million (TPM)  
482 method for read quantification as described in Ribicic *et al*<sup>58,59</sup>. Ten variables in the metadata  
483 associated with the chemical environment at each sampling location were analyzed using the  
484 principal component analysis module on scikit-learn 0.23.1<sup>87</sup>. All sites regardless of *idrA* presence  
485 were included in the analysis. Missing metadata values were imputed using the Multivariate  
486 Imputation by Chained Equations method (MICE)<sup>88</sup>. Variables included in the analysis were  
487 'Sampling depth [m]', 'Mean\_Temperature [deg C]', 'Mean\_Salinity [PSU]', 'Mean\_Oxygen  
488 [umol/kg]', 'Mean\_Nitrates[umol/L]', 'NO2 [umol/L]', 'PO4 [umol/L]', 'SI [umol/L]', 'NO2NO3  
489 [umol/L]', and irradiance 'AMODIS:PAR8d,Einsteins/m-2/d-1'. Components were built using  
490 “`pca.fit_transform()`” and confidence ellipses at one standard deviation were set for each group.  
491 Component coefficients were extracted from principal components by using “`pca.components_`”  
492 and displayed as a loadings plot. Explained variance was also extracted from “`pca.components_`”  
493 to display on PCA axes. The map of *idrA* abundance was created using Cartopy 0.17.

494

495 **Figure legends.**

496

497 **Figure 1:** Phylogeny and Physiology of *Denitromonas iodocrescerans*. A) 16S rRNA gene  
498 phylogeny of *Denitromonas iodocrescerans* (denoted by a purple star) belonging to a subclade of  
499 *Azoarcus*, separate from other known *Azoarcus* species. B) TEM images of an active culture of *D.*  
500 *iodocrescerans* with the scale at 2  $\mu\text{m}$  (left) and 0.2  $\mu\text{m}$  (right) taken on a Technai 12 TEM. C)  
501 Iodate consumption (■), acetate consumption (▲), iodide production (■), and growth (●; measured  
502 as optical density at  $\lambda=600\text{nm}$ ; OD600) in an active culture of *D. iodocrescerans* growing  
503 anaerobically. N=3 and error bars show standard deviation. D) Iodate consumption across all five  
504 conditions assessed in the growth experiment in C. N=3 and error bars show standard deviation.  
505 E) Optical density (OD600) in the presence (■), absence (●), and amendment after 14 hours  
506 incubation (▲) of  $\text{MoO}_4^{2-}$ . N=7 and error bars show standard deviation.

507

508 **Figure 2:** Identification of unique gene cluster in iodate reducing genomes enabling the  
509 identification and characterization of the iodate reductase (IdrA). A) A four-way comparison  
510 between two genomes from confirmed DIRM (solid line) and two genomes from closely related  
511 non-DIRM (dotted line) identifying 26 shared genes among the two taxonomically distinct iodate  
512 reducing bacteria (Table S2). B) The three genes upstream of the predicted molybdopterin  
513 oxidoreductase (IdrA) involved in DIR. C) anaerobic growth of wildtype of *D. iodocrescerans* in  
514 the presence (●) or absence (◐) of iodate in comparison to the  $\Delta\text{idrA}$  mutant (◑) or the  $\Delta\text{idrA}$   
515 mutant complemented with an empty vector (▲) or with *idrA* in *trans* (■). N=8 and error bars  
516 represent standard deviation.

517

518 **Figure 3** Mechanistic and Ecological Models of Iodate Reduction. A) A representation of the  
519 electron flow (black arrows) from the quinone pool to iodate in *D. iodocrescerans*. Abbreviations:  
520  $\text{QH}_2$ —reduced quinone, Q—oxidized quinone, bc1—bc1 complex,  $\text{IO}_3^-$ —iodate, HIO—  
521 hypoiodous acid,  $\text{I}^-$ —iodide. Gray arrows represent micromolar production of yet unknown oxidant  
522 that is detoxified by IdrP<sub>1</sub> and IdrP<sub>2</sub>. B) Ecological model of iodate reducing bacteria. Top right  
523 panel represents locations in the open ocean near oxygen minimum zones inhabited by DIORM.  
524 Bottom right panel represents host associated DIORM. DOM—dissolved organic matter.

525

526 **Figure 4** Phylogeny and Taxonomic Distribution of IdrA. A) Phylogeny of Molybdopterin  
527 Oxidoreductases (Pfam 00384) using pre-aligned proteins from the representative proteomes 55  
528 dataset. Green bars indicate location of an individual protein in each branch belonging to the  
529 labelled group. B) Phylogeny of IdrA (purple), AioA (gray), and an unknown clade (light green)  
530 that contains proteins from organisms showing demonstrated arsenite oxidation abilities. Colored  
531 circles along the edges of the IdrA clade indicate the different Phyla each organism belongs to.

532

533 **Figure 5** Phylogeny and Gene Neighborhoods of arsenite oxidase, iodate reductase, and the  
534 associated unknown clade. A pruned tree of the molybdopterin oxidoreductase phylogeny (left)  
535 showing a representative subset of genomes identified from Figure 3B. *Denitromonas*  
536 *iodocrescerans* is illustrated in bold. Genome neighborhoods (right) show 10 genes upstream and  
537 downstream (if present) from the *idrA* locus. Individual genes were clustered into groups based on  
538 amino acid similarity using MMSeqs2 and the frequency of genomes possessing an individual  
539 cluster is colored by the intensity of purple. Circles above each gene represents either the

540 molybdopterin oxidoreductase (●), the associated Rieske containing subunit (●), or the di-haem  
541 cytochrome c peroxidases (●).

542

543 Figure 6 Analysis of Tara Oceans dataset identifies possible ecological niche above oxygen  
544 minimum zones. A) A map indicating sampled locations during the Tara expedition (x) alongside  
545 sampling locations with IdrA present (purple circles). Markers overlaid directly on top of each  
546 other demonstrate transect samples from different depths at a given location. Size of purple circle  
547 shows the cumulative TPM at a particular site. B) Chart on the left shows the TPM of individual  
548 hits on a scaffold organized by Tara location identifier. Coloration represents the individual Tara  
549 station while marker shape indicates general geographic location. Chart on the right correlates the  
550 number of unique IdrA hits at any given site to the cumulative TPM at an individual location. Tara  
551 station is denoted by color and general geographic location is denoted by marker shape. C) A  
552 principal component analysis displaying the first two principal components. Locations are grouped  
553 by IdrA absent (x), presence of a single IdrA hit (■), or presence of multiple hits (■). Ellipses  
554 represent 1 standard deviation of the mean. The color of the ellipse corresponds to the variable  
555 grouping. D) A loading plot of the ten variables used in the first two principal components with  
556 variables identified at the end of each arrow. E) The means of select environmental variables at  
557 IdrA present sites (purple) and IdrA absent sites (gray). Error bars indicate 95% confidence  
558 interval. Units for each of the variables are located near the variable name.

559

560

561

562 **References**

- 563 1 Carpenter, L. J. in *Encyclopedia of Atmospheric Sciences* 205-219 (Elsevier, 2015).
- 564 2 Chemburkar, S. R., Deming, K. C. & Reddy, R. E. Chemistry of thyroxine: an historical perspective  
565 and recent progress on its synthesis. *Tetrahedron* **66**, 1955-1962, doi:10.1016/J.TET.2009.12.044  
566 (2010).
- 567 3 Schweizer, U. & Steegborn, C. Thyroid hormones—From crystal packing to activity to reactivity.  
568 *Angew. Chem* **54**, 12856-12858, doi:10.1002/anie.201506919 (2015).
- 569 4 Küpper, F. C. *et al.* Commemorating two centuries of iodine research: an interdisciplinary  
570 overview of current research. *Angew. Chem* **50**, 11598-11620, doi:10.1002/anie.201100028  
571 (2011).
- 572 5 Manley, S. L. & Dastoor, M. N. Methyl iodide (CH<sub>3</sub>I) production by kelp and associated microbes.  
573 *Marine Biol* **98**, 477-482, doi:10.1007/BF00391538 (1988).
- 574 6 Lebel, L. S., Dickson, R. S. & Glowa, G. A. Radioiodine in the atmosphere after the Fukushima Dai-  
575 ichi nuclear accident. *J Environ Radioact* **151**, 82-93, doi:10.1016/j.jenvrad.2015.06.001 (2016).
- 576 7 Luther, G. W., Wu, J. & Cullen, J. B. Redox Chemistry of Iodine in Seawater Frontier Molecular  
577 Orbital Theory Considerations. *Aquat Chem Adv*, doi:10.1021/ba-1995-0244.ch006 (1995).
- 578 8 Gonzales, J., Tymon, T., Küpper, F. C., Edwards, M. S. & Carrano, C. J. The potential role of kelp  
579 forests on iodine speciation in coastal seawater. *PLOS ONE* **12**, e0180755,  
580 doi:10.1371/journal.pone.0180755 (2017).
- 581 9 Tsunogai, S. & Sase, T. Formation of iodide-iodine in the ocean. *Deep Sea Research and*  
582 *Oceanographic Abstracts* **16**, 489-496, doi:10.1016/0011-7471(69)90037-0 (1969).
- 583 10 Cuncell, T. B., Landa, E. R. & Lovley, D. R. Microbial reduction of iodate. *Wat Air Soil Pollut* **100**,  
584 99–106. <https://doi.org/10.1023/A> (1997)  
585
- 586 11 Youngblut, M. D. *et al.* Perchlorate Reductase Is Distinguished by Active Site Aromatic Gate  
587 Residues. *J Biol Chem* **291**, 9190-9202, doi:10.1074/jbc.M116.714618 (2016).
- 588 12 Farrenkopf Ay, A. M. *et al.* Reduction of iodate in seawater during Arabian Sea incubations and in  
589 laboratory cultures of the marine *Shewanella putrefaciens* strain MR-4 shipboard bacterium.  
590 *Marine Chem* **57**, 347-354 (1997).
- 591 13 Amachi, S. *et al.* Dissimilatory iodate reduction by marine *Pseudomonas* sp. strain SCT. *Appl*  
592 *Environ Microbiol* **73**, 5725-5730, doi:10.1128/AEM.00241-07 (2007).
- 593 14 Yamazaki, C. *et al.* A novel dimethylsulfoxide reductase family of molybdenum enzyme, Idr, is  
594 involved in iodate respiration by *Pseudomonas* sp. SCT. *Environ Microbiol* **n/a**, doi:10.1111/1462-  
595 2920.14988 (2020).

- 596 15 Youngblut, M. D., Wang, O., Barnum, T. P. & Coates, J. D. (Per)chlorate in biology on earth and  
597 beyond. *Ann rev Microbiol* **70**, 435-457, doi:10.1146/annurev-micro-102215-095406 (2016).
- 598 16 WHO. Alternative drinking-water disinfectants. 52-55 (2018).
- 599 17 Haimovich, O. & Treinin, A. Disproportionation of hypiodite. *J Phys Chem* **71**, 1941-1943,  
600 doi:10.1021/j100865a068 (1967).
- 601 18 Toporek, Y. J. *et al.* Metal reduction and protein secretion genes required for iodate reduction by  
602 *Shewanella oneidensis*. *Appl Environ Microbiol* **85**, doi:10.1128/aem.02115-18 (2019).
- 603 19 Carlström, C. I. *et al.* Characterization of an anaerobic marine microbial community exposed to  
604 combined fluxes of perchlorate and salinity. *Appl Microbiol Biotechnol* **100**, 9719-9732,  
605 doi:10.1007/s00253-016-7780-5 (2016).
- 606 20 Yip, K. C.-W. & Gu, J.-D. A novel bacterium involved in the degradation of 2-methylindole isolated  
607 from sediment of Inner Deep Bay of Hong Kong. *Appl Environ Biotechnol* **1**, 52-63 (2015).
- 608 21 Glazyrina, J. *et al.* High cell density cultivation and recombinant protein production with  
609 *Escherichia coli* in a rocking-motion-type bioreactor. *Microb Cell Fact* **9**, 42, doi:10.1186/1475-  
610 2859-9-42 (2010).
- 611 22 Loferer-Krössbacher, M., Klima, J. & Psenner, R. Determination of bacterial cell dry mass by  
612 transmission electron microscopy and densitometric image analysis. *Appl Environ Microbiol* **64**,  
613 688-694, doi:10.1128/aem.64.2.688-694.1998 (1998).
- 614 23 McInerney, M. J. & Beaty, P. S. Anaerobic community structure from a nonequilibrium  
615 thermodynamic perspective. *Can J Microbiol* **34**, 487-493, doi:10.1139/m88-083 (1988).
- 616 24 Stern, J. H. & Passchier, A. A. The heats of formation of triiodide and iodate ions. *J Phys Chem* **66**,  
617 752-753, doi:10.1021/j100810a041 (1962).
- 618 25 Weber, K. A., Achenbach, L. A. & Coates, J. D. Microorganisms pumping iron: anaerobic microbial  
619 iron oxidation and reduction. *Nat Rev Microbiol* **4**, 752-764, doi:10.1038/nrmicro1490 (2006).
- 620 26 Leimkühler, S. & Iobbi-Nivol, C. Bacterial molybdoenzymes: old enzymes for new purposes. *FEMS*  
621 *Microbiol Rev* **40**, 1-18, doi:10.1093/femsre/fuv043 (2016).
- 622 27 McEwan, A. G., Ridge, J. P., McDevitt, C. A. & Hugenholtz, P. The DMSO reductase family of  
623 microbial molybdenum enzymes; molecular properties and role in the dissimilatory reduction of  
624 toxic elements. *Geomicrobiol J* **19**, 3-21, doi:10.1080/014904502317246138 (2002).
- 625 28 Chaudhuri, S. K., O'Connor, S. M., Gustavson, R. L., Achenbach, L. A. & Coates, J. D. Environmental  
626 factors that control microbial perchlorate reduction. *Appl Environ Microbiol* **68**, 4425-4430,  
627 doi:10.1128/aem.68.9.4425-4430.2002 (2002).
- 628 29 Snel, B., Bork, P. & Huynen, M. A. Genomes in flux: the evolution of archaeal and proteobacterial  
629 gene content. *Gen Res* **12**, 17-25 (2002).



- 630 30 Saunders, J. K., Fuchsman, C. A., McKay, C. & Roca, G. Complete arsenic-based respiratory cycle  
631 in the marine microbial communities of pelagic oxygen-deficient zones. *Proc Nat Acad Sci*,  
632 201818349, doi:10.1073/pnas.1818349116 (2019).
- 633 31 Dabir, D. V. *et al.* A role for cytochrome c and cytochrome c peroxidase in electron shuttling from  
634 Erv1. *EMBO J* **26**, 4801-4811 (2007).
- 635 32 Martins, D., Kathiresan, M. & English, A. M. Cytochrome c peroxidase is a mitochondrial heme-  
636 based H<sub>2</sub>O<sub>2</sub> sensor that modulates antioxidant defense. *Free Rad Bio Med* **65**, 541-551 (2013).
- 637 33 Almagro Armenteros, J. J. *et al.* SignalP 5.0 improves signal peptide predictions using deep neural  
638 networks. *Nat Biotechnol* **37**, 420-423, doi:10.1038/s41587-019-0036-z (2019).
- 639 34 Berks, B. C. The Twin-Arginine Protein Translocation Pathway. *Annu Rev Biochem* **84**, 843-864,  
640 doi:10.1146/annurev-biochem-060614-034251 (2015).
- 641 35 Toporek, M., Michałowska-Kaczmarczyk, A. M. & Michałowski, T. Disproportionation reactions of  
642 HIO and NaIO in static and dynamic systems. *Am J Anal Chem* **5**, 1046 (2014).
- 643 36 Youngblut, M. D. *et al.* Perchlorate reductase is distinguished by active site aromatic gate residues.  
644 *J Biol Chem* **291**, 9190-9202, doi:10.1074/jbc.M116.714618 (2016).
- 645 37 Ellis, K. V. & Van Vree, H. B. R. J. Iodine used as a water-disinfectant in turbid waters. *Wat Res* **23**,  
646 671-676, doi:[https://doi.org/10.1016/0043-1354\(89\)90198-X](https://doi.org/10.1016/0043-1354(89)90198-X) (1989).
- 647 38 Liebensteiner, M. G., Pinkse, M. W. H., Schaap, P. J., Stams, A. J. M. & Lomans, B. P. Archaeal (per)  
648 chlorate reduction at high temperature: an interplay of biotic and abiotic reactions. *Science* **340**,  
649 85-87 (2013).
- 650 39 Dudley, M., Salamone, A. & Nerenberg, R. Kinetics of a chlorate-accumulating, perchlorate-  
651 reducing bacterium. *Wat Res* **42**, 2403-2410, doi:<https://doi.org/10.1016/j.watres.2008.01.009>  
652 (2008).
- 653 40 Melnyk, R. A. *et al.* Novel mechanism for scavenging of hypochlorite involving a periplasmic  
654 methionine-rich peptide and methionine sulfoxide reductase. *MBio* **6** (2015).
- 655 41 Steinegger, M. & Söding, J. MMseqs2 enables sensitive protein sequence searching for the  
656 analysis of massive data sets. *Nat Biotechnol* **35**, 1026-1028, doi:10.1038/nbt.3988 (2017).
- 657 42 Ordoñez, O. F., Rasuk, M. C., Soria, M. N., Contreras, M. & Farías, M. E. *Haloarchaea* from the  
658 Andean Puna: biological role in the energy metabolism of arsenic. *Microb Ecol* **76**, 695-705,  
659 doi:10.1007/s00248-018-1159-3 (2018).
- 660 43 Anantharaman, K. *et al.* Thousands of microbial genomes shed light on interconnected  
661 biogeochemical processes in an aquifer system. *Nat Comm* **7**, 13219, doi:10.1038/ncomms13219  
662 (2016).
- 663 44 Becraft, E. D. *et al.* Rokubacteria: Genomic giants among the uncultured bacterial phyla. *Front*  
664 *Microbiol* **8**, doi:10.3389/fmicb.2017.02264 (2017).

- 665 45 He, Z. *et al.* A novel denitrifying methanotroph of the NC10 phylum and its microcolony. *Sci Rep*  
666 6, 32241, doi:10.1038/srep32241 (2016).
- 667 46 Melnyk, R. A. *et al.* Identification of a perchlorate reduction genomic island with novel regulatory  
668 and metabolic genes. *Appl Environ Microbiol* 77, 7401-7404, doi:10.1128/AEM.05758-11 (2011).
- 669 47 Scornavacca, C., Zickmann, F. & Huson, D. H. Tanglegrams for rooted phylogenetic trees and  
670 networks. *Bioinformatics (Oxford, England)* 27, i248-i256, doi:10.1093/bioinformatics/btr210  
671 (2011).
- 672 48 Juhas, M. *et al.* Genomic islands: tools of bacterial horizontal gene transfer and evolution. *FEMS*  
673 *Microbiol Rev* 33, 376-393, doi:10.1111/j.1574-6976.2008.00136.x (2009).
- 674 49 Reiter, W. D., Palm, P. & Yeats, S. Transfer RNA genes frequently serve as integration sites for  
675 prokaryotic genetic elements. *Nucl Acid Res* 17, 1907-1914, doi:10.1093/nar/17.5.1907 (1989).
- 676 50 Larbig, K. D. *et al.* Gene islands integrated into tRNAGly genes confer genome diversity on a  
677 *Pseudomonas aeruginosa* clone. *J Bacteriol* 184, 6665, doi:10.1128/JB.184.23.6665-6680.2002  
678 (2002).
- 679 51 Boyd, E. & Barkay, T. The mercury resistance operon: from an origin in a geothermal environment  
680 to an efficient detoxification machine. *Front Microbiol* 3, doi:10.3389/fmicb.2012.00349 (2012).
- 681 52 Besaury, L. *et al.* Abundance and diversity of copper resistance genes *cusA* and *copA* in microbial  
682 communities in relation to the impact of copper on Chilean marine sediments. *Mar Pollut Bull* 67,  
683 16-25, doi:<https://doi.org/10.1016/j.marpolbul.2012.12.007> (2013).
- 684 53 Jin, H. M. *et al.* *Litorimicrobium taeanense* gen. nov., sp. nov., isolated from a sandy beach.  
685 *International J Sys Evol Microbiol* 61, 1392-1396, doi:<https://doi.org/10.1099/ijs.0.025007-0>  
686 (2011).
- 687 54 Alex, A. & Antunes, A. Comparative genomics reveals metabolic specificity of *Endozoicomonas*  
688 isolated from a marine sponge and the genomic repertoire for host-bacteria symbioses.  
689 *Microorganisms* 7, 635 (2019).
- 690 55 Kim, Y.-O. *et al.* *Litoreibacterascidiaceicola* sp. nov., isolated from the golden sea squirt  
691 *Halocynthiaaaurantium*. *Int J Sys Evol Microbiol* 64, 2545-2550,  
692 doi:<https://doi.org/10.1099/ijs.0.064196-0> (2014).
- 693 56 Kupper, F. C. *et al.* Iodide accumulation provides kelp with an inorganic antioxidant impacting  
694 atmospheric chemistry. *Proc Nat Acad Sci* 105, 6954-6958, doi:10.1073/pnas.0709959105 (2008).
- 695 57 Jung, H. S., Jeong, S. E., Chun, B. H., Quan, Z.-X. & Jeon, C. O. *Rhodophyticola porphyridii* gen. nov.,  
696 sp. nov., isolated from a red alga, *Porphyridium marinum*. *Int J Sys Evol Microbiol* 69, 1656-1661,  
697 doi:<https://doi.org/10.1099/ijsem.0.003371> (2019).
- 698 58 Wagner, G. P., Kin, K. & Lynch, V. J. Measurement of mRNA abundance using RNA-seq data: RPKM  
699 measure is inconsistent among samples. *Theory Biosci* 131, 281-285, doi:10.1007/s12064-012-  
700 0162-3 (2012).

- 701 59 Ribicic, D. *et al.* Microbial community and metagenome dynamics during biodegradation of  
702 dispersed oil reveals potential key-players in cold Norwegian seawater. *Mar Pollut Bull* **129**, 370-  
703 378, doi:<https://doi.org/10.1016/j.marpolbul.2018.02.034> (2018).
- 704 60 Lachkar, Z., Lévy, M. & Smith, K. S. Strong intensification of the Arabian Sea oxygen minimum zone  
705 in response to Arabian Gulf warming. *Geophys Res Lett* **46**, 5420-5429, doi:10.1029/2018gl081631  
706 (2019).
- 707 61 Farrenkopf, A. M. & Iii, G. W. L. Iodine chemistry reflects productivity and denitrification in the  
708 Arabian Sea: evidence for flux of dissolved species from sediments of western India into the OMZ.  
709 *Deep-Sea Res II* **49**, 2303-2318 (2002).
- 710 62 Bertagnolli, A. D. & Stewart, F. J. Microbial niches in marine oxygen minimum zones. *Nat Rev*  
711 *Microbiol* **16**, 723-729, doi:10.1038/s41579-018-0087-z (2018).
- 712 63 Cutter, G. A., Moffett, J. W., Nielsdóttir, M. C. & Sanial, V. Multiple oxidation state trace elements  
713 in suboxic waters off Peru: In situ redox processes and advective/diffusive horizontal transport.  
714 *Mar Chem* **201**, 77-89, doi:10.1016/J.MARCHEM.2018.01.003 (2018).
- 715 64 Karstensen, J., Stramma, L. & Visbeck, M. Oxygen minimum zones in the eastern tropical Atlantic  
716 and Pacific oceans. *Prog Ocean* **77**, 331-350, doi:<https://doi.org/10.1016/j.pocean.2007.05.009>  
717 (2008).
- 718 65 Farrenkopf, A. M., Luther, G. W., Truesdale, V. W. & Van Der Weijden, C. H. Sub-surface iodide  
719 maxima: evidence for biologically catalyzed redox cycling in Arabian Sea OMZ during the SW  
720 intermonsoon. *Deep Sea Res Part II: Topical Studies in Oceanography* **44**, 1391-1409,  
721 doi:[https://doi.org/10.1016/S0967-0645\(97\)00013-1](https://doi.org/10.1016/S0967-0645(97)00013-1) (1997).
- 722 66 Kalvelage, T. *et al.* Aerobic microbial respiration in oceanic oxygen minimum zones. *PloS one* **10**,  
723 e0133526-e0133526, doi:10.1371/journal.pone.0133526 (2015).
- 724 67 Howarth, R. W. Nutrient limitation of net primary production in marine ecosystems. *Ann Rev Ecol*  
725 *Sys* **19**, 89-110 (1988).
- 726 68 Shalel Levanon, S., San, K.-Y. & Bennett, G. N. Effect of oxygen on the *Escherichia coli* ArcA and  
727 FNR regulation systems and metabolic responses. *Biotech Bioeng* **89**, 556-564,  
728 doi:10.1002/bit.20381 (2005).
- 729 69 Wadley, M. R. *et al.* *Modelling iodine in the ocean.* (2020).
- 730 70 Waite, T. J. & Truesdale, V. W. Iodate reduction by *Isochrysis galbana* is relatively insensitive to  
731 de-activation of nitrate reductase activity—are phytoplankton really responsible for iodate  
732 reduction in seawater? *Mar Chem* **81**, 137-148, doi:10.1016/S0304-4203(03)00013-6 (2003).
- 733 71 Coates, J. D. & Achenbach, L. A. Microbial perchlorate reduction: rocket-fuelled metabolism. *Nat*  
734 *Rev Microbiol* **2**, 569-580, doi:10.1038/nrmicro926 (2004).
- 735 72 Jones, D. S., Bailey, J. V. & Flood, B. E. *Sedimenticola thiotaurini* sp. nov., a sulfur-oxidizing  
736 bacterium isolated from salt marsh sediments, and emended descriptions of the genus

- 737 *Sedimenticola* and *Sedimenticola selenatireducens*. *Int J Sys Evol Microbiol* **65**, 2522-2530,  
738 doi:10.1099/ijms.0.000295 (2015).
- 739 73 Boden, R., Hutt, L. P. & Rae, A. W. Reclassification of *Thiobacillus aquaesulis* (Wood & Kelly, 1995)  
740 as *Annwoodia aquaesulis* gen. nov., comb. nov., transfer of *Thiobacillus* (Beijerinck, 1904) from  
741 the *Hydrogenophilales* to the *Nitrosomonadales*, proposal of *Hydrogenophilalia* class. nov. within  
742 the 'Proteobacteria', and four new families within the orders *Nitrosomonadales* and  
743 *Rhodocyclales*. *Int J Sys Evol Microbiol* **67**, 1191-1205,  
744 doi:<https://doi.org/10.1099/ijsem.0.001927> (2017).
- 745 74 Bankevich, A. *et al.* SPAdes: a new genome assembly algorithm and its applications to single-cell  
746 sequencing. *J Comput Biol* **19**, 455-477, doi:10.1089/cmb.2012.0021 (2012).
- 747 75 Wick, R. R., Schultz, M. B., Zobel, J. & Holt, K. E. Bandage: interactive visualization of de novo  
748 genome assemblies. *Bioinformatics* **31**, 3350-3352, doi:10.1093/bioinformatics/btv383 (2015).
- 749 76 Seemann, T. Prokka: rapid prokaryotic genome annotation. *Bioinformatics* **30**, 2068-2069,  
750 doi:10.1093/bioinformatics/btu153 (2014).
- 751 77 Eddy, S. HMMER user's guide. *Department of Genetics, Washington University School of Medicine*  
752 **2**, 13 (1992).
- 753 78 Edgar, R. C. MUSCLE: multiple sequence alignment with high accuracy and high throughput. *Nucl*  
754 *Acid Res* **32**, 1792-1797, doi:10.1093/nar/gkh340 (2004).
- 755 79 Price, M. N., Dehal, P. S. & Arkin, A. P. FastTree 2--approximately maximum-likelihood trees for  
756 large alignments. *PLoS One* **5**, e9490, doi:10.1371/journal.pone.0009490 (2010).
- 757 80 Huerta-Cepas, J., Serra, F. & Bork, P. ETE 3: Reconstruction, Analysis, and Visualization of  
758 Phylogenomic Data. *Mol Biol Evol* **33**, 1635-1638, doi:10.1093/molbev/msw046 (2016).
- 759 81 Barnum, T. P. *et al.* Genome-resolved metagenomics identifies genetic mobility, metabolic  
760 interactions, and unexpected diversity in perchlorate-reducing communities. *ISME J* **12**, 1568-  
761 1581, doi:10.1038/s41396-018-0081-5 (2018).
- 762 82 Cock, P. J. *et al.* Biopython: freely available Python tools for computational molecular biology and  
763 bioinformatics. *Bioinformatics* **25**, 1422-1423 (2009).
- 764 83 Karsenti, E. The making of Tara Oceans: funding blue skies research for our Blue Planet. *Mol Sys*  
765 *Biol* **11**, 811, doi:10.15252/msb.20156271 (2015).
- 766 84 Pesant, S. *et al.* Open science resources for the discovery and analysis of Tara Oceans data. *Sci*  
767 *Data* **2**, 150023, doi:10.1038/sdata.2015.23 (2015).
- 768 85 Langmead, B. & Salzberg, S. L. Fast gapped-read alignment with Bowtie 2. *Nat Meth* **9**, 357 (2012).
- 769 86 Li, H. *et al.* The sequence alignment/map format and SAMtools. *Bioinformatics* **25**, 2078-2079  
770 (2009).

- 771 87 Pedregosa, F. *et al.* Scikit-learn: Machine learning in Python. *J Mach Learn Res* **12**, 2825-2830  
772 (2011).
- 773 88 Azur, M. J., Stuart, E. A., Frangakis, C. & Leaf, P. J. Multiple imputation by chained equations: what  
774 is it and how does it work? *Int J Methods Psychiatr Res* **20**, 40-49, doi:10.1002/mpr.329 (2011).
- 775 89 Chao, L. S.-L., Davis, R. E. & Moyer, C. L. Characterization of bacterial community structure in  
776 vestimentiferan tubeworm *Ridgeia piscesae* trophosomes. *Mar Ecol* **28**, 72-85,  
777 doi:<https://doi.org/10.1111/j.1439-0485.2007.00151.x> (2007).
- 778 90 Patra, A. K. *et al.* Phylogenetic relationship between symbionts of tubeworm *Lamellibrachia*  
779 *satsuma* and the sediment microbial community in Kagoshima Bay. *Ocean Sci J* **51**, 317-332,  
780 doi:10.1007/s12601-016-0028-6 (2016).
- 781 91 Gardebrecht, A. *et al.* Physiological homogeneity among the endosymbionts of *Riftia pachyptila*  
782 and *Tevnia jerichonana* revealed by proteogenomics. *ISME J* **6**, 766-776,  
783 doi:10.1038/ismej.2011.137 (2012).
- 784 92 Wang, Z. *et al.* *Alginatibacterium sediminis* gen. nov., sp. nov., a novel marine  
785 gammaproteobacterium isolated from coastal sediment. *Int J Sys Evol Microbiol* **69**, 511-516,  
786 doi:<https://doi.org/10.1099/ijsem.0.003187> (2019).
- 787 93 Park, S., Park, J.-M., Kang, C.-H. & Yoon, J.-H. *Aliiroseovarius pelagivivens* gen. nov., sp. nov.,  
788 isolated from seawater, and reclassification of three species of the genus *Roseovarius* as  
789 *Aliiroseovarius crassostreae* comb. nov., *Aliiroseovarius halocynthiae* comb. nov. and  
790 *Aliiroseovarius sediminilitoris* comb. nov. *Int J Sys Evol Microbiol* **65**, 2646-2652,  
791 doi:<https://doi.org/10.1099/ijms.0.000315> (2015).
- 792 94 Kasai, Y., Takahata, Y., Manefield, M. & Watanabe, K. RNA-based stable isotope probing and  
793 isolation of anaerobic benzene-degrading bacteria from gasoline-contaminated groundwater.  
794 *Appl Environ Microbiol* **72**, 3586-3592, doi:10.1128/aem.72.5.3586-3592.2006 (2006).
- 795 95 Jung, Y.-T., Park, S., Lee, J.-S. & Yoon, J.-H. *Defluviimonas aquaemixtae* sp. nov., isolated from the  
796 junction between a freshwater spring and the ocean. *Int J Sys Evol Microbiol* **64**, 4191-4197,  
797 doi:<https://doi.org/10.1099/ijms.0.068767-0> (2014).
- 798 96 Zhang, D.-C. *et al.* *Marinobacter psychrophilus* sp. nov., a psychrophilic bacterium isolated from  
799 the Arctic. *Int J Sys Evol Microbiol* **58**, 1463-1466, doi:<https://doi.org/10.1099/ijms.0.65690-0>  
800 (2008).
- 801 97 Kim, H. J. *et al.* *Moritella dasanensis* sp. nov., a psychrophilic bacterium isolated from the Arctic  
802 ocean. *Int J Sys Evol Microbiol* **58**, 817-820, doi:<https://doi.org/10.1099/ijms.0.65501-0> (2008).
- 803 98 Nogi, Y. & Kato, C. Taxonomic studies of extremely barophilic bacteria isolated from the Mariana  
804 Trench and description of *Moritella yayanosii* sp. nov., a new barophilic bacterial isolate.  
805 *Extremophiles* **3**, 71-77, doi:10.1007/s007920050101 (1999).
- 806 99 Hameed, A. *et al.* *Oricola cellulositytica* gen. nov., sp. nov., a cellulose-degrading bacterium of the  
807 family *Phyllobacteriaceae* isolated from surface seashore water, and emended descriptions of

- 808 *Mesorhizobium loti* and *Phyllobacterium myrsinacearum*. *Antonie van Leeuwenhoek* **107**, 759-771,  
809 doi:10.1007/s10482-014-0370-6 (2015).
- 810 100 Hahnke, S., Tindall, B. J., Schumann, P., Simon, M. & Brinkhoff, T. *Pelagimonas varians* gen. nov.,  
811 sp. nov., isolated from the southern North Sea. *Int J Sys Evol Microbiol* **63**, 835-843,  
812 doi:<https://doi.org/10.1099/ijms.0.040675-0> (2013).
- 813 101 Li, Y. *et al.* *Photobacterium proteolyticum* sp. nov., a protease-producing bacterium isolated from  
814 ocean sediments of Laizhou Bay. *Int J Sys Evol Microbiol* **67**, 1835-1840,  
815 doi:<https://doi.org/10.1099/ijsem.0.001873> (2017).
- 816 102 Rajasabapathy, R. *et al.* *Roseovarius azorensis* sp. nov., isolated from seawater at Espalamaca,  
817 Azores. *Antonie van Leeuwenhoek* **105**, 571-578, doi:10.1007/s10482-013-0109-9 (2014).
- 818 103 Pujalte, M. J., Macián, M. C., Arahal, D. R. & Garay, E. *Stappia alba* sp. nov., isolated from  
819 Mediterranean oysters. *Syst Appl Microbiol* **28**, 672-678, doi:10.1016/j.syapm.2005.05.010  
820 (2005).
- 821 104 Colquhoun, D., Hovland, H., Hellberg, H., Haug, T. & Nilsen, H. *Moritella viscosa* isolated from  
822 farmed Atlantic cod (*Gadus morhua*). *Bull Eur Assoc Fish Path* **24**, 109-114 (2004).
- 823 105 Huang, Z., Guo, F., Lai, Q. & Shao, Z. *Notoacmeibacter marinus* gen. nov., sp. nov., isolated from  
824 the gut of a limpet and proposal of *Notoacmeibacteraceae* fam. nov. in the order Rhizobiales of  
825 the class Alphaproteobacteria. *Int J Sys Evol Microbiol* **67**, 2527-2531,  
826 doi:<https://doi.org/10.1099/ijsem.0.001951> (2017).
- 827 106 Yan, X.-R. & Tuo, L. *Notoacmeibacter ruber* sp. nov., a novel endophytic bacterium isolated from  
828 leaf of *Rhizophora stylosa*. *Antonie van Leeuwenhoek* **112**, 919-925, doi:10.1007/s10482-019-  
829 01225-3 (2019).
- 830 107 O'Halloran, J. A. *et al.* *Pseudovibrio axinellae* sp. nov., isolated from an Irish marine sponge. *Int J*  
831 *Sys Evol Microbiol* **63**, 141-145, doi:<https://doi.org/10.1099/ijms.0.040196-0> (2013).
- 832 108 Shiba, T. *Roseobacter litoralis* gen. nov., sp. nov., and *Roseobacter denitrificans* sp. nov., aerobic  
833 pink-pigmented bacteria which contain bacteriochlorophyll a. *Sys Appl Microbiol* **14**, 140-145,  
834 doi:[https://doi.org/10.1016/S0723-2020\(11\)80292-4](https://doi.org/10.1016/S0723-2020(11)80292-4) (1991).
- 835 109 Kim, Y.-O. *et al.* *Ruegeria halocynthiae* sp. nov., isolated from the sea squirt *Halocynthia roretzi*.  
836 *Int J Sys Evol Microbiol* **62**, 925-930, doi:<https://doi.org/10.1099/ijms.0.031609-0> (2012).
- 837 110 Flood, B. E. *et al.* Single-cell (meta-)genomics of a dimorphic candidatus *Thiomargarita nelsonii*  
838 reveals genomic plasticity. *Front Microbiol* **7**, doi:10.3389/fmicb.2016.00603 (2016).
- 839 111 Beaz-Hidalgo, R., Doce, A., Pascual, J., Toranzo, A. E. & Romalde, J. L. *Vibrio gallaecicus* sp. nov.  
840 isolated from cultured clams in north-western Spain. *Sys Appl Microbiol* **32**, 111-117,  
841 doi:<https://doi.org/10.1016/j.syapm.2008.12.002> (2009).

- 842 112 Gomez-Gil, B. *et al.* *Vibrio sinaloensis* sp. nov., isolated from the spotted rose snapper, *Lutjanus*  
843 *guttatus* Steindachner, 1869. *Int J Sys Evol Microbiol* **58**, 1621-1624,  
844 doi:<https://doi.org/10.1099/ijms.0.65719-0> (2008).
- 845 113 Gómez-León, J., Villamil, L., Lemos, M. L., Novoa, B. & Figueras, A. Isolation of *Vibrio alginolyticus*  
846 and *Vibrio splendidus* from aquacultured carpet shell clam (*Ruditapes decussatus*) larvae  
847 associated with mass mortalities. *Appl Environ Microbiol* **71**, 98-104, doi:10.1128/aem.71.1.98-  
848 104.2005 (2005).
- 849 114 BORREGO, J. J. *et al.* *Vibrio tapetis* sp. nov., the causative agent of the brown ring disease affecting  
850 cultured clams. *Int J Sys Evol Microbiol* **46**, 480-484, doi:<https://doi.org/10.1099/00207713-46-2-480>  
851 (1996).
- 852 115 Thompson, F. L., Thompson, C. C. & Swings, J. *Vibrio tasmaniensis* sp. nov., isolated from Atlantic  
853 Salmon (*Salmo salar* L.). *Sys Appl Microbiol* **26**, 65-69,  
854 doi:<https://doi.org/10.1078/072320203322337326> (2003).
- 855 116 Kojima, H., Watanabe, M. & Fukui, M. *Sulfurivermis fontis* gen. nov., sp. nov., a sulfur-oxidizing  
856 autotroph, and proposal of *Thiopfundaceae* fam. nov. *Int J Sys Evol Microbiol* **67**, 3458-3461,  
857 doi:<https://doi.org/10.1099/ijsem.0.002137> (2017).
- 858

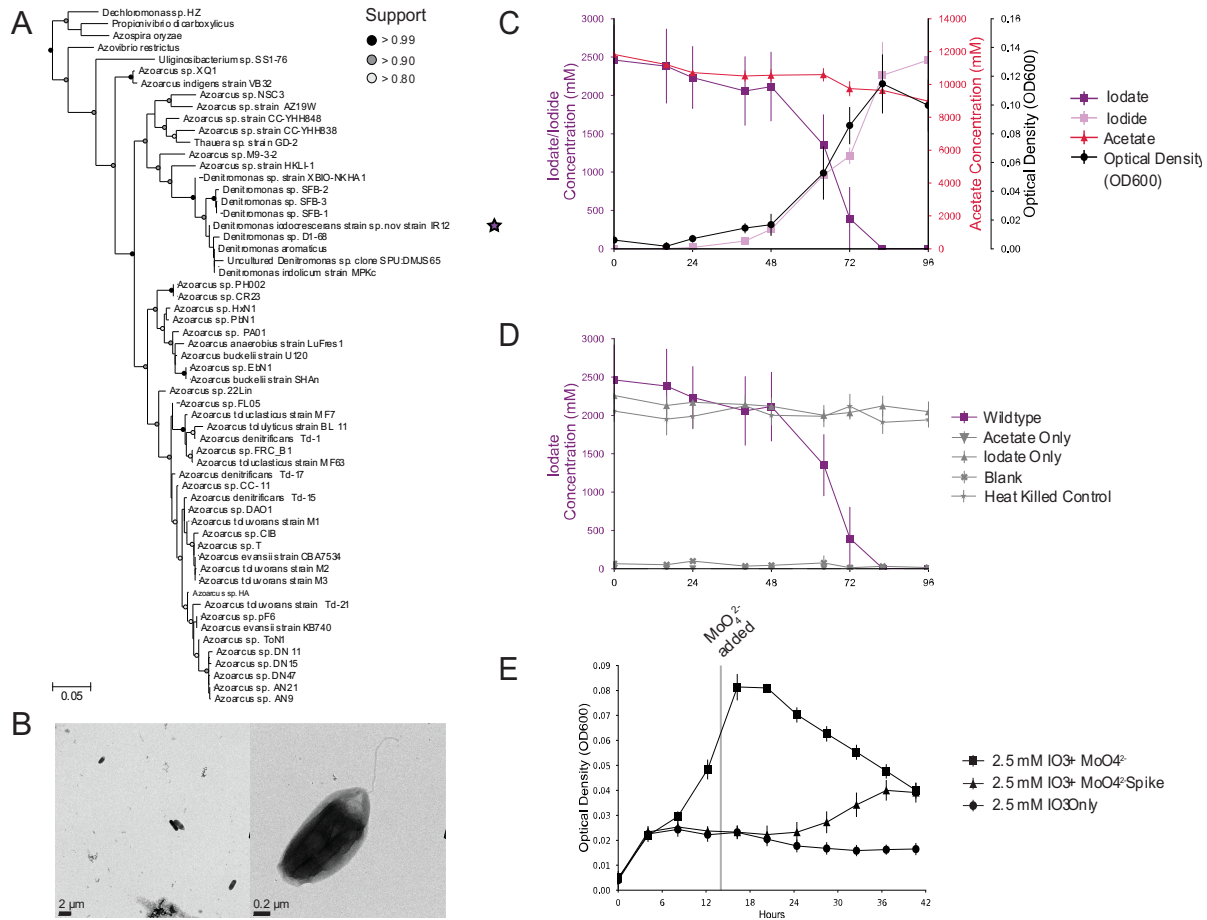

Figure 1: Phylogeny and Physiology of *Denitromonas iodocrescerans*



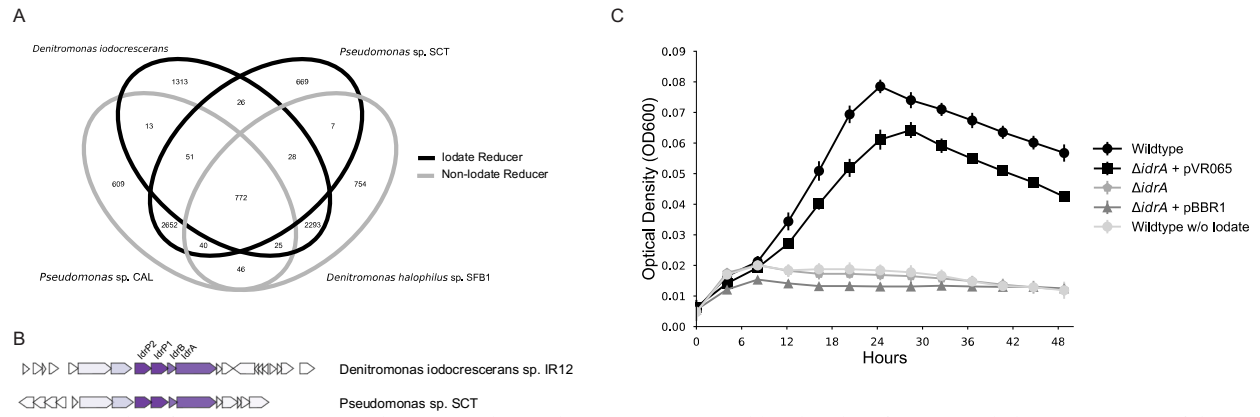

Figure 2: Identification unique gene cluster in iodate reducing genomes enables the identification and characterization of the iodate reductase (*IdrA*)

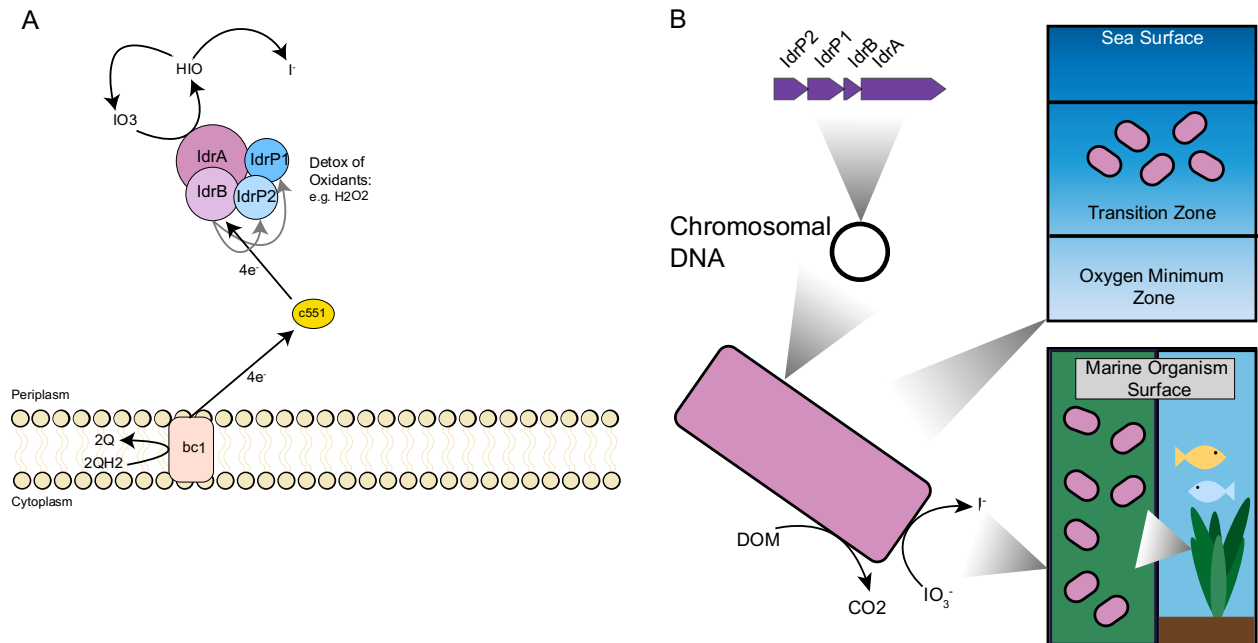

Figure 3 Mechanistic and Ecological Models of Iodate Reduction

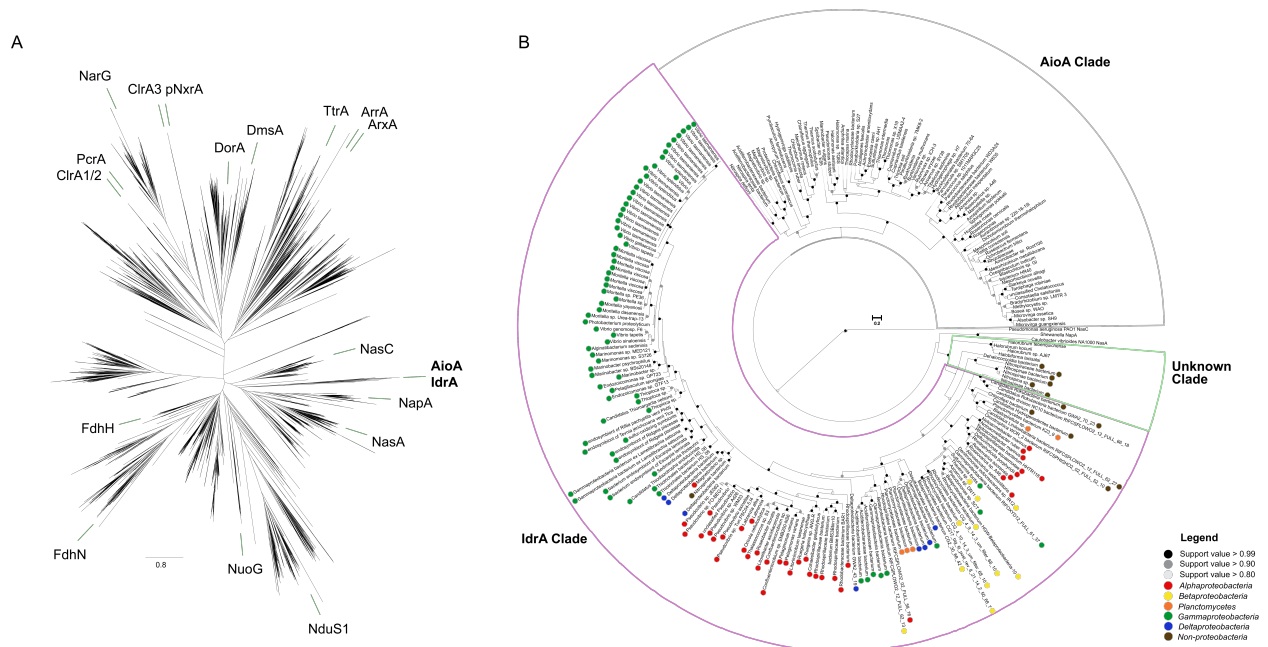

Figure 4 Phylogeny and Taxonomic Distribution of *IdrA*

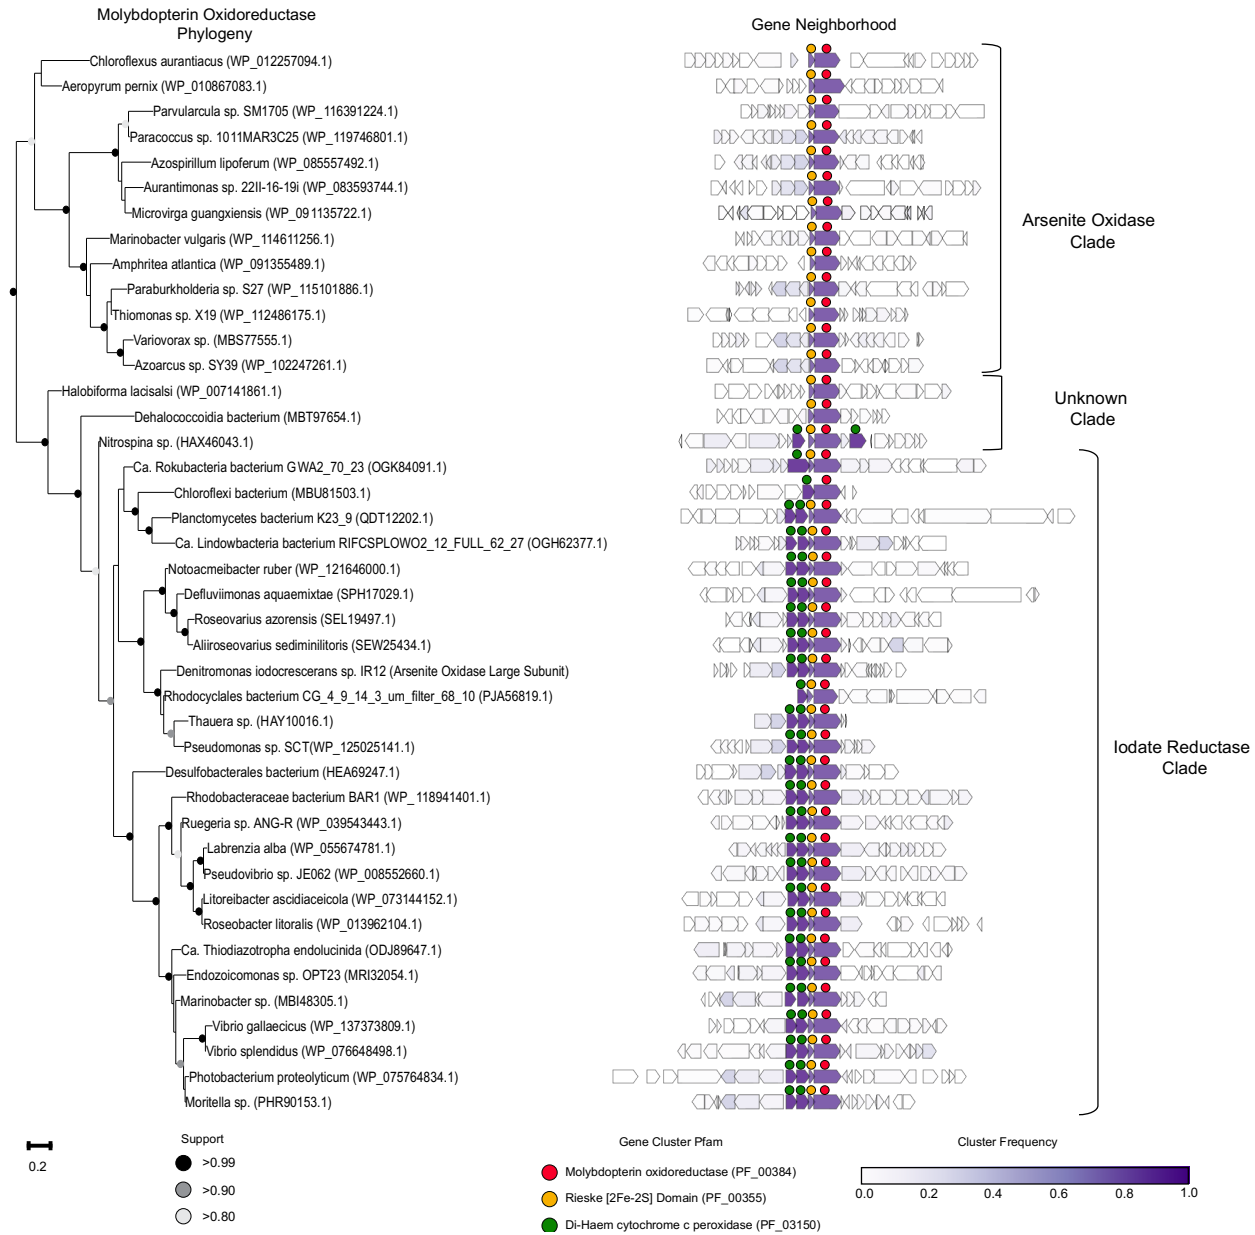

Figure 5 Phylogeny and Gene Neighborhoods of arsenite oxidase, iodate reductase, and the associated unknown clade

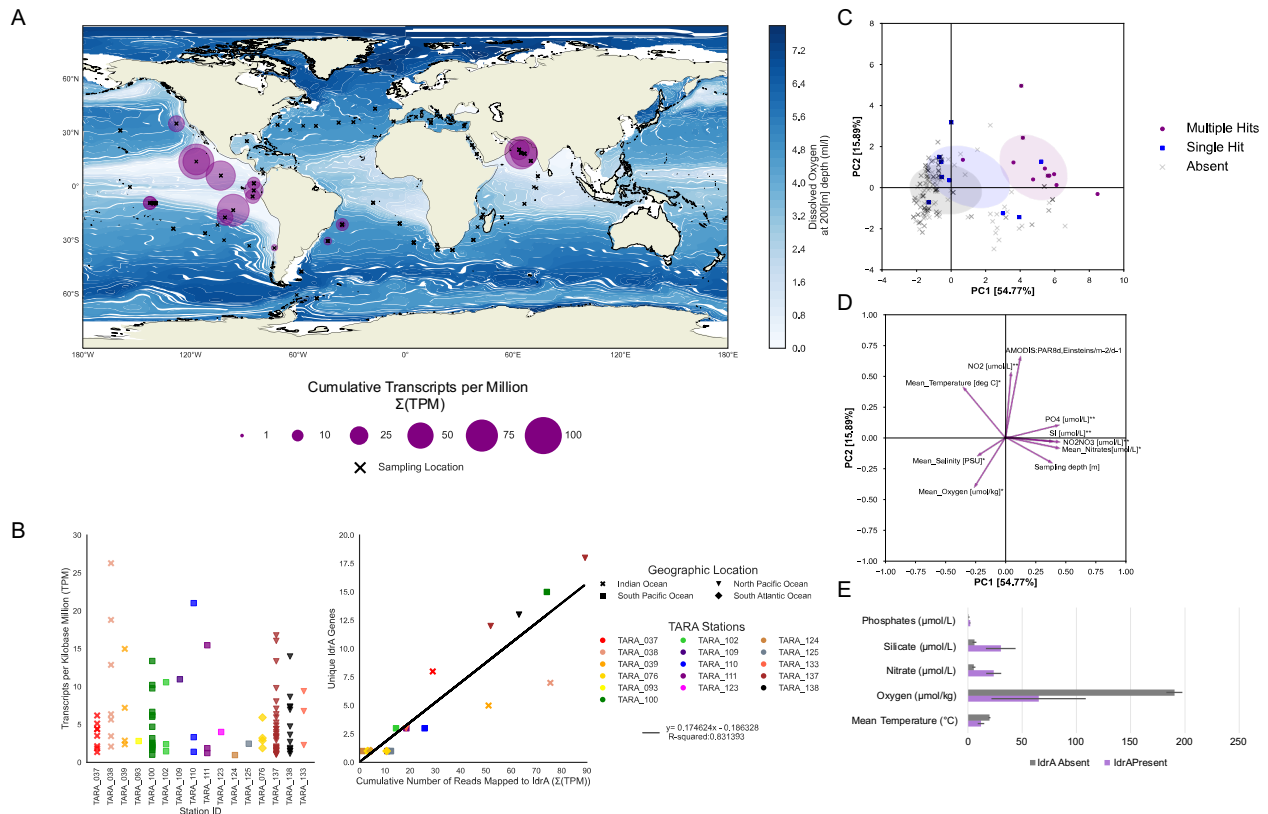

Figure 6 Analysis of Tara Oceans dataset identifies possible ecological niche above oxygen minimum zones
